# Supplementary material for: Palladium-catalyzed Br/D exchange of arenes: selective deuterium incorporation with versatile functional group tolerance and high efficiency
Source: Royal Society of Chemistry journal article supplement (doi:10.1039/c5qo00181a), 2015-01-01

## Palladium catalyzed Br/D exchange of arenes: Selective deuterium incorporation with versatile functional group tolerance and high efficiency

Hong-Hai Zhang, Peter V. Bonnesen, and Kunlun Hong\*

Center for Nanophase Materials Sciences, Oak Ridge National laboratory, Oak Ridge,  
Tennessee, TN 37831

[hongkq@ornl.gov](mailto:hongkq@ornl.gov)

### Supporting Information

**General:** Proton and carbon NMR spectra for all compounds were recorded in CDCl<sub>3</sub> on Varian VNMRS 500 MHz NMR spectrometer, operating at 499.717 MHz for proton. Chemical shifts were determined relative to residual CHCl<sub>3</sub> (7.26 ppm for <sup>1</sup>H-NMR and 77.2 ppm for <sup>13</sup>C-NMR). All yields reported refer to isolated yields unless otherwise indicated. GC-MS experiments were carried out using an Agilent 6890 series GC and a 5973 Mass Selective Detector System. All the solvents were degassed by purging with dry nitrogen for 2 h before use. All the reagents were purchased from commercial sources and used as received.

**General Procedure for Br/D exchange with Pd<sub>2</sub>(dba)<sub>3</sub>/*t*-Bu<sub>3</sub>P as catalyst and DCOONa as deuterium source:** In an argon glovebox, to an 8 mL vial containing Pd<sub>2</sub>(dba)<sub>3</sub> (18.3 mg, 0.02 mmol), *t*-Bu<sub>3</sub>P (12 mg, 0.06 mmol), DCOONa (138 mg, 2 mmol), and aryl bromide (1 mmol) was added DMSO (1 mL). Then the sealed vial was brought out of the glovebox and put into an oil bath with pre-set to the reaction temperature. The reaction was performed at 80 °C until the GC/MS showed the reaction was completed. The reaction was quenched with saturated NH<sub>4</sub>Cl solution. The product was extracted with dichloromethane (3 x 15 mL). The combined organic layer was washed with brine and dried over Na<sub>2</sub>SO<sub>4</sub>. After removal of solvents under vacuum, the crude product was purified via column chromatography (silica gel) using the appropriate binary solvent system (vol/vol).

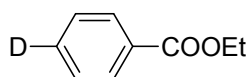

**2a<sup>1</sup>:** Purified by column chromatography (hexane/dichloromethane = 6:1, R<sub>f</sub> = 0.5), Yield: 95% colorless oil. <sup>1</sup>H NMR: δ 8.02 (d, *J* = 10.2 Hz, 2 H), 7.41 (d, *J* = 10.2 Hz, 2 H), 4.36 (d, *J* = 8.4 Hz, 2 H), 1.38 (t, *J* = 7.8 Hz, 3 H); <sup>13</sup>C NMR: δ 166.6, 132.5 (t, *J* = 23.75 Hz), 130.5, 129.5, 128.2, 60.9, 14.3;

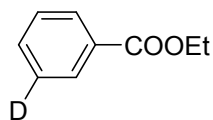

**2b<sup>1</sup>:** Purified by column chromatography (hexane/dichloromethane = 6:1, R<sub>f</sub> = 0.5), Yield: 91% colorless oil. <sup>1</sup>H NMR: δ 8.02 - 8.04 (m, 2 H), 7.53 (d, *J* = 9.0 Hz, 1 H), 7.41 (dd, *J* = 9.0 Hz, *J* = 9.6 Hz, 3 H), 4.36 (d, *J* = 8.4 Hz, 2 H), 1.38 (t, *J* = 7.8 Hz, 3 H); <sup>13</sup>C NMR: δ 166.6, 132.7, 130.5, 129.5, 129.4, 128.3, 128.0 (t, *J* = 23.7 Hz), 60.9, 14.3;

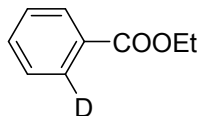

**2c<sup>2</sup>**: Purified by column chromatography (hexane/dichloromethane = 6:1, R<sub>f</sub> = 0.5), Yield: 90% colorless oil. <sup>1</sup>H NMR: δ 7.41 (t, *J* = 8.4 Hz, 1 H), 7.00 (m, 2 H), 6.94 (s, 1 H), 3.84 (s, 3 H); <sup>13</sup>C NMR: δ 166.6, 132.8, 130.4, 129.5, 129.2 (t, *J* = 23.7 Hz), 128.3, 128.2, 60.9, 14.3

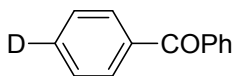

**2d<sup>3</sup>**: Purified by column chromatography (hexane/dichloromethane = 6:1, R<sub>f</sub> = 0.5), Yield: 90% colorless oil. <sup>1</sup>H NMR: δ 7.78 - 7.80 (m, 4 H), 7.57 (t, *J* = 9.0 Hz, 1 H), 7.45 - 7.48 (m, 4 H); <sup>13</sup>C NMR: δ 196.8, 137.7, 132.5, 132.2 (t, *J* = 25.0 Hz), 130.1, 128.4, 128.2;

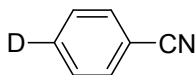

**2e<sup>1</sup>**: Purified by column chromatography (hexane/dichloromethane = 6:1, R<sub>f</sub> = 0.5), Yield: 82% colorless oil. <sup>1</sup>H NMR: δ 7.64 (d, *J* = 9.6 Hz, 2 H), 7.46 (d, *J* = 9.6 Hz, 2 H); <sup>13</sup>C NMR: δ 132.5 (t, *J* = 25.0 Hz), 132.2, 129.0, 118.9, 112.4;

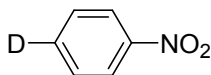

**2f<sup>4</sup>**: Purified by column chromatography (hexane/dichloromethane = 6:1, R<sub>f</sub> = 0.5), Yield: 94% colorless oil. <sup>1</sup>H NMR: δ 8.21 (d, *J* = 0.2 Hz, 2 H), 7.53 (d, *J* = 9.6 Hz, 2 H); <sup>13</sup>C NMR: δ 148.4, 134.5 (t, *J* = 25.0 Hz), 129.4, 123.6;

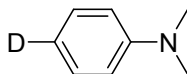

**2g<sup>4</sup>**: Purified by column chromatography (hexane/dichloromethane = 2:1, R<sub>f</sub> = 0.4), Yield: 80% colorless oil. <sup>1</sup>H NMR: δ 7.30 (d, *J* = 9.6 Hz, 2 H), 6.81 (d, *J* = 10.8 Hz, 2 H), 3.00 (s, 6 H); <sup>13</sup>C NMR: δ 150.8, 129.1, 116.6 (t, *J* = 25.0 Hz), 112.9, 40.8;

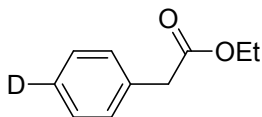

**2h**: Purified by column chromatography (hexane/dichloromethane = 10:1, R<sub>f</sub> = 0.5), Yield: 93% white solid. <sup>1</sup>H NMR: δ 7.28 (dd, *J* = 10.2 Hz, *J* = 18.6 Hz, 4 H), 4.13 (q, *J* = 9.0 Hz, 2 H), 3.59 (s, 2 H), 1.23 (t, *J* = 8.4 Hz, 3 H); <sup>13</sup>C NMR: δ 171.6, 134.1, 129.2, 128.4, 126.7 (t, *J* = 25.0 Hz), 60.8, 41.4, 14.1; HRMS (ESI): calc. for C<sub>10</sub>H<sub>11</sub>DO<sub>2</sub> [M]<sup>+</sup> 165.0895; found 165.0894.

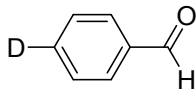

**2i<sup>4</sup>**: Purified by column chromatography (hexane/dichloromethane = 10:1, R<sub>f</sub> = 0.5), Yield: 87% colorless oil. <sup>1</sup>H NMR: δ 9.96 (s, 1 H), 7.82 (d, *J* = 9.6 Hz, 2 H), 7.47 (d, *J* = 9.0 Hz, 2 H); <sup>13</sup>C NMR: δ 192.3, 136.4, 134.1 (t, *J* = 25.0 Hz), 129.7, 128.8;

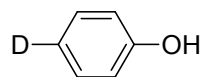

**2j<sup>5</sup>**: Purified by column chromatography (hexane/ethyl acetate = 10:1, Rf = 0.4), Yield: 82% colorless oil. <sup>1</sup>H NMR: δ 9.02 (d, *J* = 6.6 Hz, 1 H), 7.81 (d, *J* = 9.0 Hz, 1 H), 7.73 (d, *J* = 9.6 Hz, 1 H), 7.43 ~ 7.46 (m, 2 H); <sup>13</sup>C NMR: δ 155.4, 129.6, 120.6 (t, *J* = 25.0 Hz), 115.3;

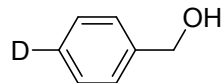

**2k<sup>6</sup>**: Purified by column chromatography (hexane/ethyl acetate = 10:1, Rf = 0.4), Yield: 94% colorless oil. <sup>1</sup>H NMR: δ 7.35 (s, 4 H), 4.67 (s, 2 H); <sup>13</sup>C NMR: δ 140.9, 128.6, 127.5 (t, *J* = 25.0 Hz), 127.1, 65.5;

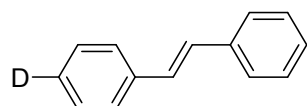

**2l**: Purified by column chromatography (hexane/dichloromethane = 40:1, Rf = 0.7), Yield: 89% colorless oil. <sup>1</sup>H NMR: δ 7.50 (d, *J* = 9.6 Hz, 4 H), 7.33 - 7.36 (m, 4 H), 7.20 ~ 7.26 (m, 1 H), 7.10 (s, 2 H); <sup>13</sup>C NMR: δ 137.4, 128.7, 128.6, 127.7, 127.4 (t, *J* = 25.0 Hz), 126.6; HRMS (ESI): calc. for C<sub>14</sub>H<sub>11</sub>D [M]<sup>+</sup> 181.1002; found 181.0998.

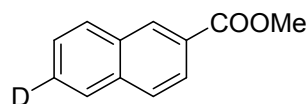

**2m**: Purified by column chromatography (hexane/dichloromethane = 6:1, Rf = 0.5), Yield: 97% white solid. <sup>1</sup>H NMR: δ 8.59 (s, 1 H), 8.04 (d, *J* = 12.0 Hz, 1 H), 7.91 (d, *J* = 12.0 Hz, 1 H), 7.53 (d, *J* = 9.6 Hz, 2 H), 7.83 - 7.85 (m, 2 H), 7.50 (d, *J* = 9.0 Hz, 1 H); <sup>13</sup>C NMR: δ 167.4, 135.6, 132.6, 131.2, 129.5, 128.3, 128.0 (t, *J* = 25.0 Hz), 127.8, 127.5, 125.6, 125.3, 52.3; HRMS (ESI): calc. for C<sub>12</sub>H<sub>9</sub>DO<sub>2</sub> [M]<sup>+</sup> 187.0744; found 187.0961.

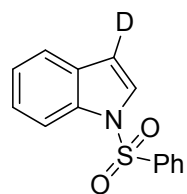

**2n**: Purified by column chromatography (hexane/dichloromethane = 2:1, Rf = 0.5), Yield: 95% white solid. <sup>1</sup>H NMR: δ 7.98 (d, *J* = 9.6 Hz, 1 H), 7.86 (d, *J* = 8.4 Hz, 2 H), 7.55 (s, 1 H), 7.51 (t, *J* = 9.0 Hz, 2 H), 7.41 (t, *J* = 9.0 Hz, 2 H), 7.30 (t, *J* = 9.6 Hz, 1 H), 7.21 (t, *J* = 9.0 Hz, 1 H); <sup>13</sup>C NMR: δ 138.5, 135.0, 134.0, 130.8, 129.4, 126.9, 126.4, 124.8, 123.6, 121.6, 113.7, 109.2 (t, *J* = 25.0 Hz); HRMS (ESI): calc. for C<sub>14</sub>H<sub>11</sub>DNO<sub>2</sub>S [M+H]<sup>+</sup> 259.0646; found 259.0640.

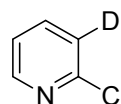

**2o**: Purified by column chromatography (hexane/dichloromethane = 1:1, Rf = 0.4), Yield: 80% white solid. <sup>1</sup>H NMR: δ 8.70 - 8.72 (m, 1 H), 7.82 (d, *J* = 9.6 Hz, 1 H), 7.51 (dd, *J* = 6.0 Hz, *J* = 9.0 Hz, 1 H); <sup>13</sup>C NMR: δ 151.4, 137.1, 134.2, 128.4 (t, *J* = 25.0 Hz), 127.1, 117.3;

**General Procedure for synthesis of deuterium-labeled aryl chloride with DCOONa as**

**deuterium source:** In an argon glovebox, to an 8 mL vial containing Pd<sub>2</sub>(dba)<sub>3</sub> (18.3 mg, 0.02 mmol), *t*-Bu<sub>3</sub>P (12 mg, 0.06 mmol), DCOONa (138 mg, 2 mmol), and aryl bromide (1 mmol) was added DMSO (1 mL). Then the sealed vial was brought out of the glovebox and put into an oil bath with pre-setting temperature. The reaction was performed at 80 °C until the GC/MS showed the reaction was completed. The reaction was quenched with saturated NH<sub>4</sub>Cl solution. The product was extracted with dichloromethane (3 x 15 mL). The combined organic layer was washed with brine and dried over Na<sub>2</sub>SO<sub>4</sub>. After removal of solvents under vacuum, the crude product was purified via column chromatography (silica gel).

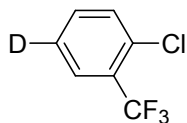

**3a:** Purified by column chromatography (hexane/dichloromethane = 20:1, R<sub>f</sub> = 0.5), Yield: 73% colorless oil. <sup>1</sup>H NMR: δ 7.68 (s, 1 H), 7.45 ~ 7.50 (m, 2 H); <sup>13</sup>C NMR: δ 132.9, 132.5, 131.6, 128.6 (q, *J* = 30.4 Hz), 127.6 (q, *J* = 4.8 Hz), 126.6 (t, *J* = 25.0 Hz), 124.1, 121.9;

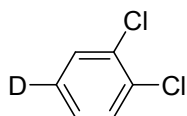

**3b:** Purified by column chromatography (hexane/dichloromethane = 40:1, R<sub>f</sub> = 0.7), Yield: 81% colorless oil. <sup>1</sup>H NMR: δ 7.42 ~ 7.43 (m, 2 H), 7.18 (d, *J* = 9.6 Hz, 1 H); <sup>13</sup>C NMR: δ 132.5, 130.5, 130.4, 127.6, 127.4 (t, *J* = 25.0 Hz);

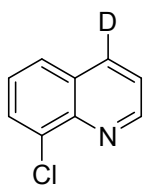

**3c:** Purified by column chromatography (hexane/dichloromethane = 1:1, R<sub>f</sub> = 0.5), Yield: 92% white solid. <sup>1</sup>H NMR: δ 7.25 (d, *J* = 9.0 Hz, 2 H), 6.84 (d, *J* = 10.2 Hz, 2 H), 4.91 (s, 1H); <sup>13</sup>C NMR: δ 151.1, 144.5, 136.4 (t, *J* = 25.0 Hz), 133.5, 129.8, 129.6, 127.0, 126.7, 121.9; HRMS (ESI): calc. for C<sub>9</sub>H<sub>6</sub>DCIN [M+H]<sup>+</sup> 165.0324; found 165.0323.

**General Procedure for synthesis of deuterium-labeled aryl boronic acid ester with NaBD<sub>4</sub> as deuterium source:** In an argon glovebox, to 8 mL vial containing Pd<sub>2</sub>(dba)<sub>3</sub> (18.3 mg, 0.02 mmol), *t*-Bu<sub>3</sub>P (12 mg, 0.06 mmol), NaBD<sub>4</sub> (80 mg, 2 mmol), and aryl bromide (1 mmol) was added DMSO (2 mL). The reaction was performed at 80 °C until the GC-MS showed the reaction was completed. The reaction was quenched with saturated NH<sub>4</sub>Cl solution. The product was extracted with dichloromethane (3 x 15 mL). The combined organic layer was washed with brine and dried over Na<sub>2</sub>SO<sub>4</sub>. After removal of solvents under vacuum, the crude product was purified via column chromatography (silica gel).

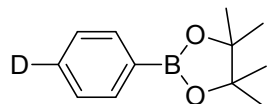

**3d:** Purified by column chromatography (hexane/dichloromethane = 6:1, R<sub>f</sub> = 0.5), Yield: 74% colorless oil. <sup>1</sup>H NMR: δ 7.79 (d, *J* = 7.8 Hz, 2 H), 7.34 (d, *J* = 9.0 Hz, 2 H), 1.33 (s, 12 H); <sup>13</sup>C NMR: δ 134.8, 131.2 (t, *J* = 25.0 Hz), 127.7, 83.9, 25.0; HRMS (ESI): calc. for C<sub>12</sub>H<sub>6</sub>DBO<sub>2</sub> [M]<sup>+</sup> 205.1379; found 205.1382.

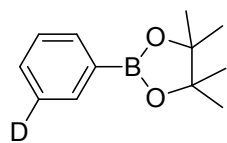

**3e:** Purified by column chromatography (hexane/dichloromethane = 6:1, R<sub>f</sub> = 0.5), Yield: 88% colorless oil. <sup>1</sup>H NMR: δ 7.79 ~ 7.80 (m, 2 H), 7.44 (d, *J* = 9.0 Hz, 1 H), 7.35 (t, *J* = 9.0 Hz, 1 H), 1.33 (s, 12 H); <sup>13</sup>C NMR: δ 134.8, 134.7, 131.2, 127.8, 127.5 (t, *J* = 25.0 Hz), 83.9, 25.0; HRMS (ESI): calc. for C<sub>12</sub>H<sub>6</sub>DBO<sub>2</sub> [M]<sup>+</sup> 205.1379; found 205.1380.

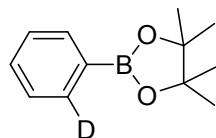

**3f:** Purified by column chromatography (hexane/dichloromethane = 6:1, R<sub>f</sub> = 0.5), Yield: 76% colorless oil. <sup>1</sup>H NMR: δ 7.79 (d, *J* = 7.8 Hz, 1 H), 7.44 (t, *J* = 9.0 Hz, 1 H), 7.35 (t, *J* = 7.8 Hz, 2 H), 1.33 (s, 12 H); <sup>13</sup>C NMR: δ 134.8, 134.6 (t, *J* = 25.0 Hz), 131.4, 127.8, 127.7, 83.9, 25.0; HRMS (ESI): calc. for C<sub>12</sub>H<sub>6</sub>DBO<sub>2</sub> [M]<sup>+</sup> 205.1379; found 205.1374.

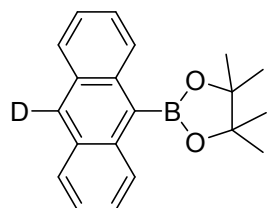

**3g:** Purified by column chromatography (hexane/dichloromethane = 6:1, R<sub>f</sub> = 0.5), Yield: 90% white solid. <sup>1</sup>H NMR (CDCl<sub>3</sub>, ppm): δ 8.43 (d, *J* = 9.6 Hz, 2 H), 7.97 (d, *J* = 9.0 Hz, 2 H), 7.41 ~ 7.48 (m, 4 H), 1.57 (s, 12 H); <sup>13</sup>C NMR (CDCl<sub>3</sub>, ppm): δ 136.0, 131.1, 129.2 (t, *J* = 25.0 Hz), 128.8, 128.4, 125.9, 124.9, 84.4, 25.2; HRMS (ESI): calcd. For C<sub>20</sub>H<sub>21</sub>DBO<sub>2</sub> [M+H]<sup>+</sup> 306.1770; found 306.1778

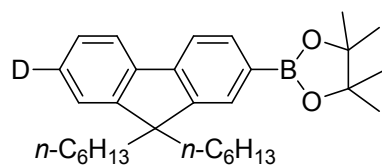

**3h**: Purified by column chromatography (hexane/dichloromethane = 4:1, Rf = 0.4), Yield: 95% white solid.  $^1\text{H}$  NMR:  $\delta$  8.00 (d,  $J$  = 9.6 Hz, 1 H), 7.74 (s, 1 H), 7.00 (dd,  $J$  = 10.2 Hz,  $J$  = 12.6 Hz, 2 H), 7.32 (s, 1 H), 7.30 (d,  $J$  = 9.6 Hz, 1 H), 1.94 ~ 1.99 (m, 4 H), 1.38 (s, 12 H), 0.98 ~ 1.10 (m, 12 H), 0.74 (t,  $J$  = 9.0 Hz, 6 H), 0.55 ~ 0.59 (m, 4 H);  $^{13}\text{C}$  NMR:  $\delta$  151.4, 150.0, 144.2, 141.0, 133.8, 128.9, 127.4 (t,  $J$  = 25.0 Hz), 126.7, 122.9, 120.2, 119.1, 55.2, 40.3, 31.6, 30.4, 29.8, 25.0, 23.8, 22.7, 14.1; HRMS (ESI): calc. for  $\text{C}_{31}\text{H}_{45}\text{DBO}_2$   $[\text{M}+\text{H}]^+$  462.3648; found 462.3653.

**General Procedure for synthesis of perdeuterium-labeled aryl compounds:** In an argon glovebox, to 8 mL vial containing  $\text{Pd}_2(\text{dba})_3$  (18.3 mg, 0.02 mmol),  $t\text{-Bu}_3\text{P}$  (12 mg, 0.06 mmol),  $\text{DCOONa}$  or  $\text{NaBD}_4$  (2 equivalent to bromide), and aryl bromide (1 mmol) was added DMSO (1 mL). The reaction was performed at 80 °C until the GC-MS showed the reaction was completed. The reaction was quenched with saturated  $\text{NH}_4\text{Cl}$  solution. The product was extracted with dichloromethane (3 x 15 mL). The combined organic layer was washed with brine and dried over  $\text{Na}_2\text{SO}_4$ . After removal of solvents under vacuum, the crude product was purified via column chromatography (silica gel).

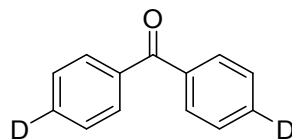

**4a:** Purified by column chromatography (hexane/dichloromethane = 6:1,  $R_f$  = 0.5), Yield: 95% colorless oil.  $^1\text{H}$  NMR:  $\delta$  7.79 (d,  $J$  = 10.2 Hz, 4 H), 7.46 (d,  $J$  = 9.6 Hz, 4 H);  $^{13}\text{C}$  NMR:  $\delta$  197.0, 137.8, 132.3 (t,  $J$  = 25.0 Hz), 128.4; HRMS (ESI): calc. for  $\text{C}_{13}\text{H}_8\text{D}_2\text{O}$   $[\text{M}]^+$  184.0852; found 184.0859.

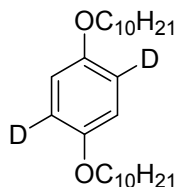

**4b:** Purified by column chromatography (hexane/dichloromethane = 6:1,  $R_f$  = 0.4), Yield: 95% white solid.  $^1\text{H}$  NMR:  $\delta$  6.80 (s, 2 H), 3.87 (t,  $J$  = 7.8 Hz, 4 H), 1.70 ~ 1.76 (m, 4 H), 1.39 ~ 1.43 (m, 4 H), 1.25 ~ 1.33 (m, 24 H), 0.86 (t,  $J$  = 9.0 Hz, 6 H);  $^{13}\text{C}$  NMR:  $\delta$  153.3, 115.5, 115.3 (t,  $J$  = 25.0 Hz), 68.8, 32.1, 29.8, 29.7, 29.6, 29.6, 29.5, 26.2, 22.9, 14.3; HRMS (ESI): calc. for  $\text{C}_{26}\text{H}_{25}\text{D}_2\text{O}_2$   $[\text{M}+\text{H}]^+$  393.3696; found 393.3704.

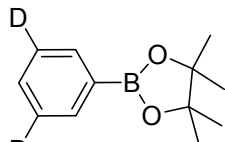

**4c:** Purified by column chromatography (hexane/dichloromethane = 5:1,  $R_f$  = 0.5), Yield: 74% colorless oil.  $^1\text{H}$  NMR:  $\delta$  7.79 (s, 2 H), 7.43 (s, 1 H), 1.32 (s, 12 H);  $^{13}\text{C}$  NMR:  $\delta$  134.6, 131.0, 127.4 (t,  $J$  = 25.0 Hz), 83.7, 24.8; HRMS (ESI): calc. for  $\text{C}_{12}\text{H}_5\text{D}_2\text{BO}_2$   $[\text{M}]^+$  206.1442; found 206.1437.

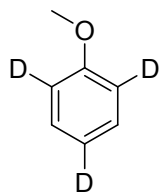

**4d:** Purified by column chromatography (hexane/dichloromethane = 10:1,  $R_f$  = 0.6), Yield: 65% colorless oil.  $^1\text{H}$  NMR:  $\delta$  7.29 (s, 2 H), 3.80 (s, 3 H);  $^{13}\text{C}$  NMR:  $\delta$  159.4, 129.2, 120.3 (t,  $J$  = 25.0 Hz), 113.6 (t,  $J$  = 25.0 Hz), 55.1;

## References cited:

1. S. W. Landvatter, D. J. Schauer, K. T. Garnes, J. F. Mack and L. B. Killmer Jr., *J. Labelled Cpd. Radiopharm.* 2001, **44**, 1025-1033;
2. Q. Liu, Y. Lan, J. Liu, G. Li, Y. D. Wu and A. Lei, *J. Am. Chem. Soc.* 2009, **131**, 10201-10210;
3. F. Labre, Y. Gimbert, P. Bannwarth, S. Olivero, E. Dunach and P. Y. Chavant, *Org. Lett.* 2014, **16**, 2366;
4. M. Linden, J. Borsboom, F. Kaspersen and G. Kemperman, *Eur. J. Org. Chem.* 2008, 2989-2997;
5. C. Y. Lee, S. J. Ahn and C. H. Cheon, *J. Org. Chem.* 2013, **78**, 12154-12160;
6. T. Furuyama, M. Yonehara, S. Arimoto, M. Kobayashi, Y. Matsumoto and M. Uchiyama, *Chem. Eur. J.* 2008, **14**, 10348-10356;



# $^1\text{H}$ and $^{13}\text{C}$ NMR Spectra:

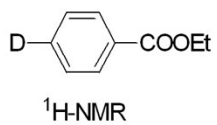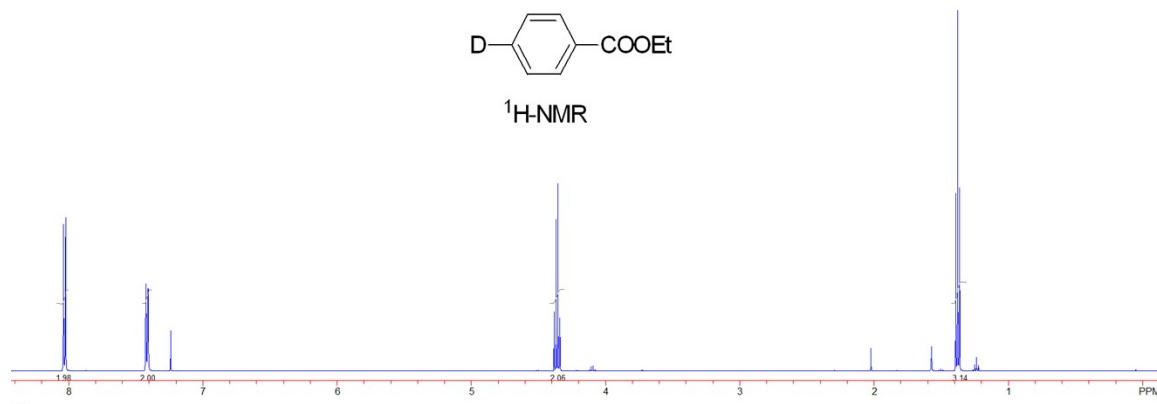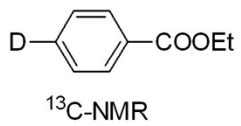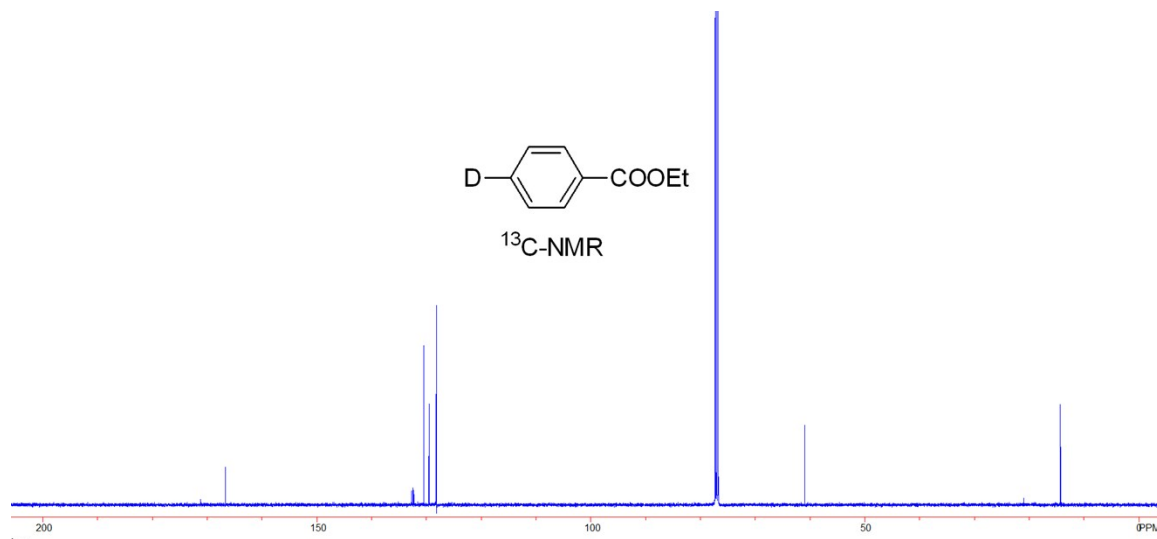

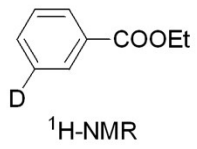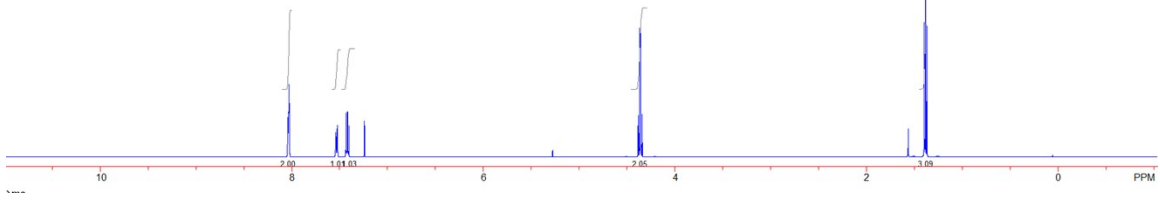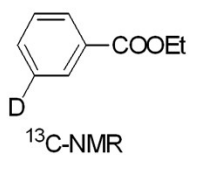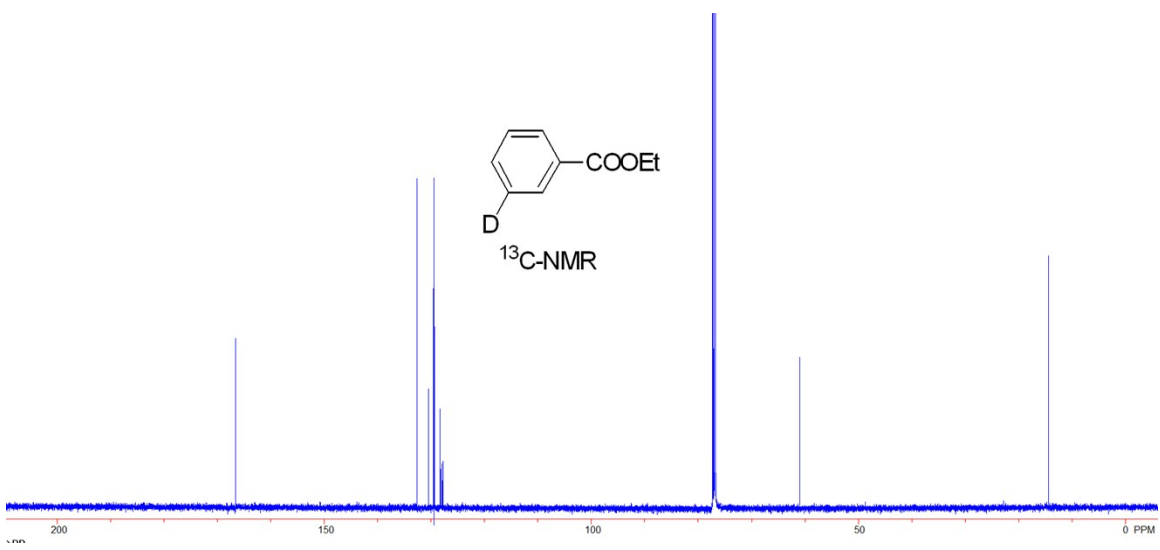

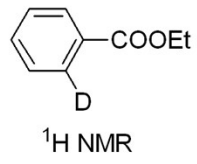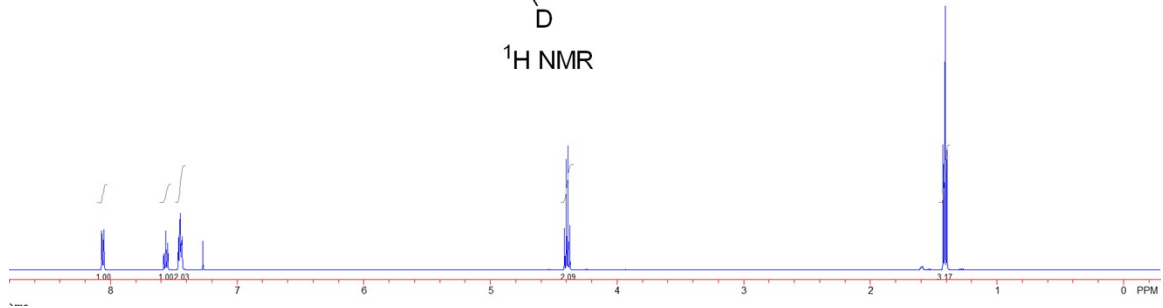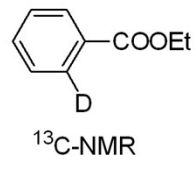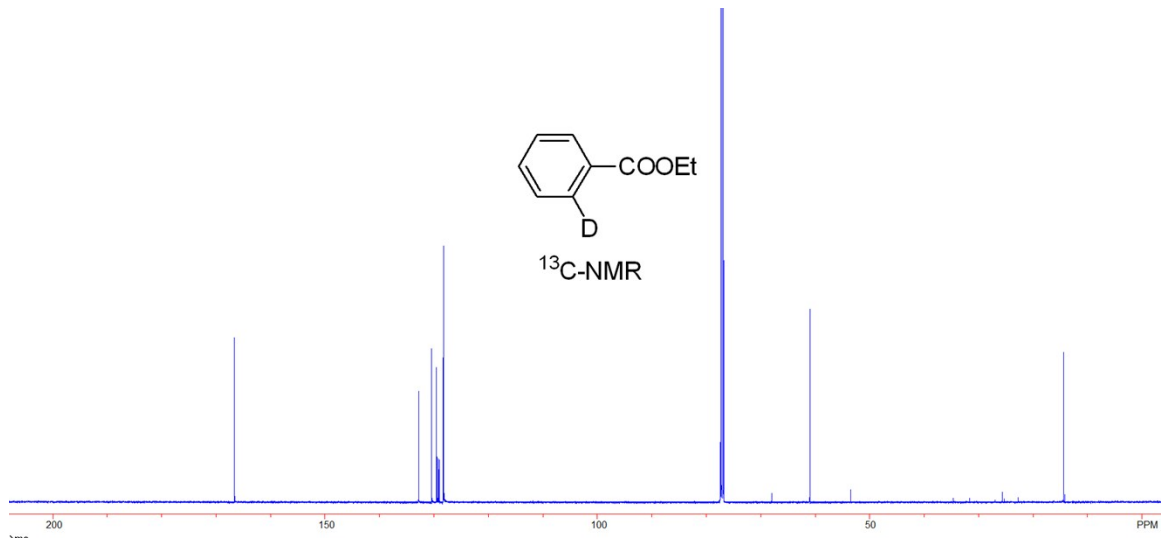

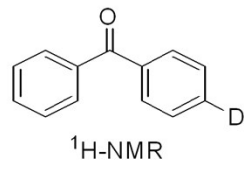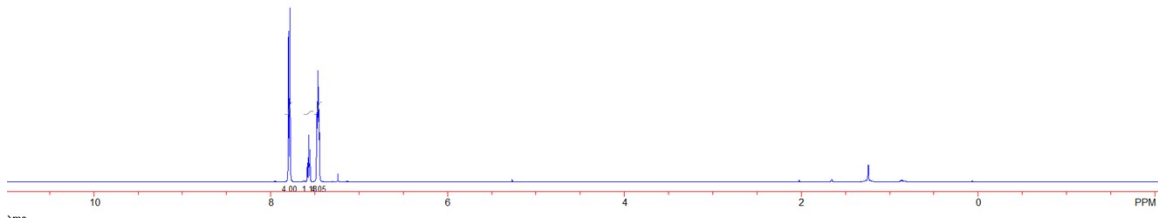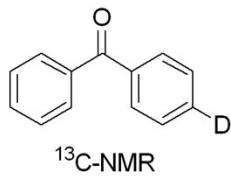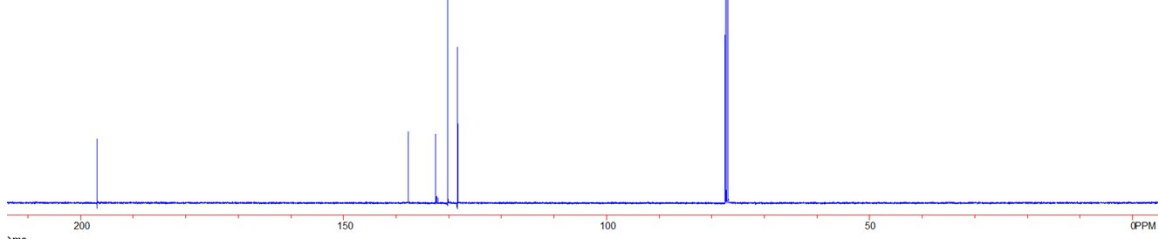

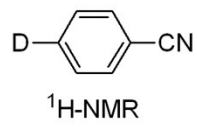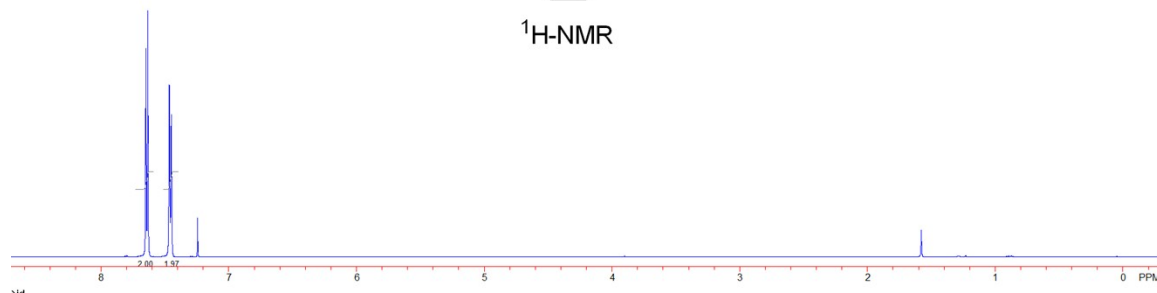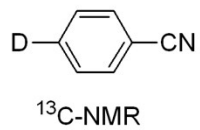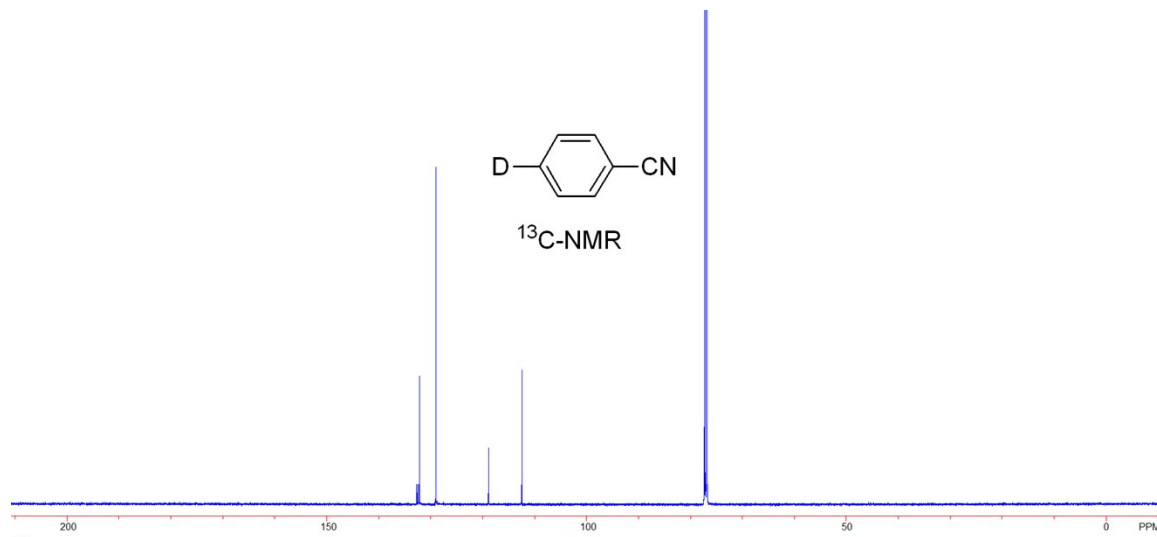

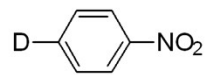

$^1\text{H-NMR}$

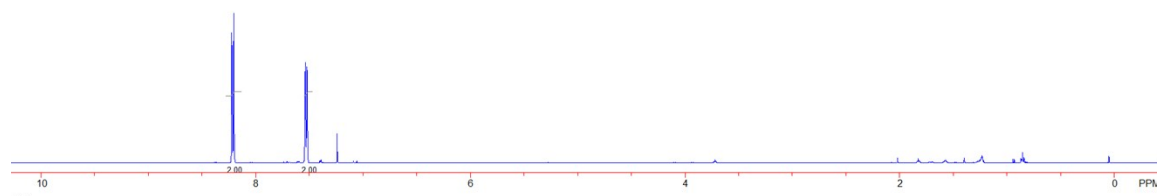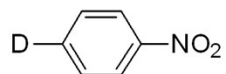

$^{13}\text{C-NMR}$

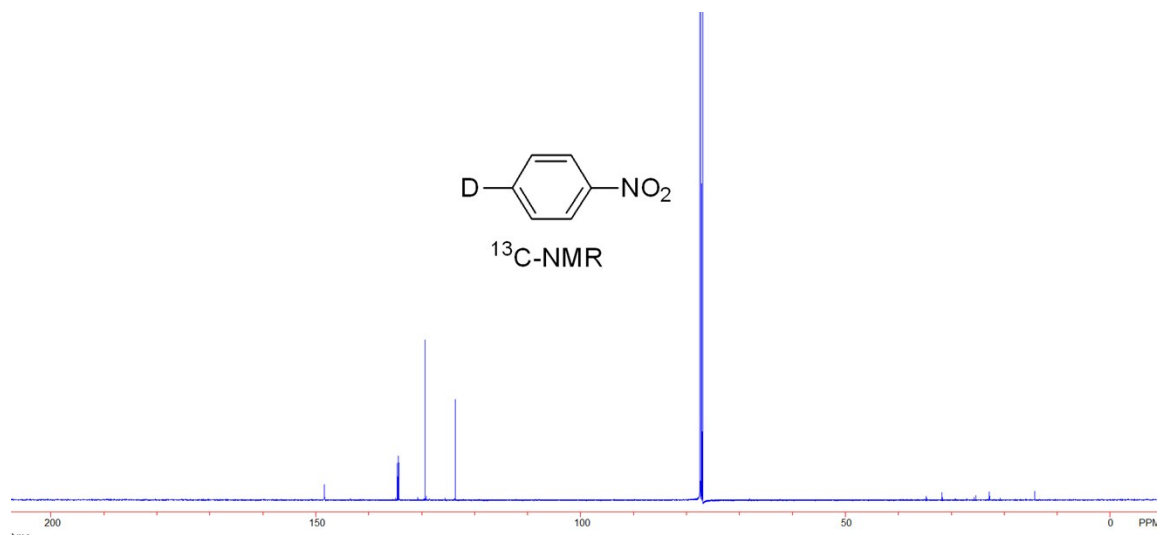

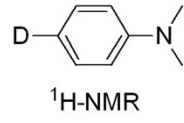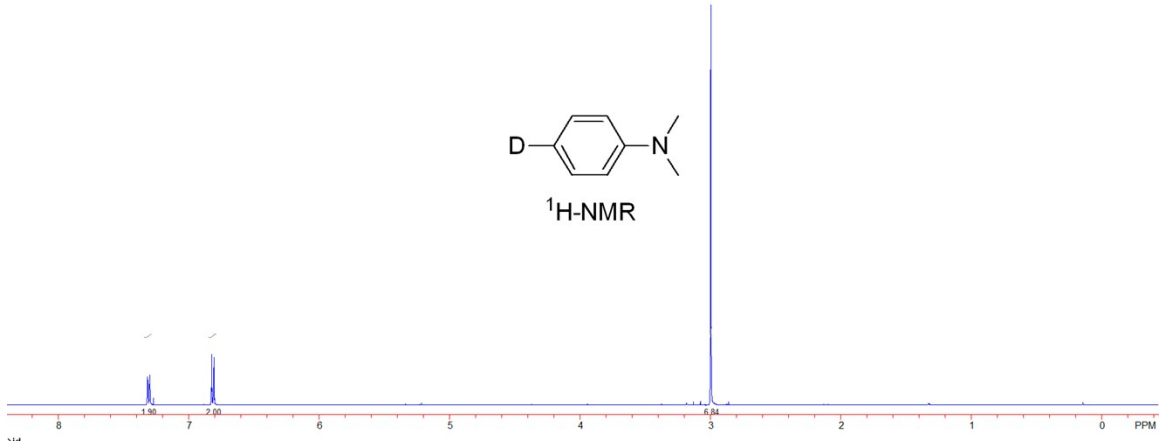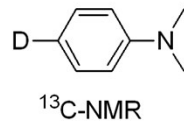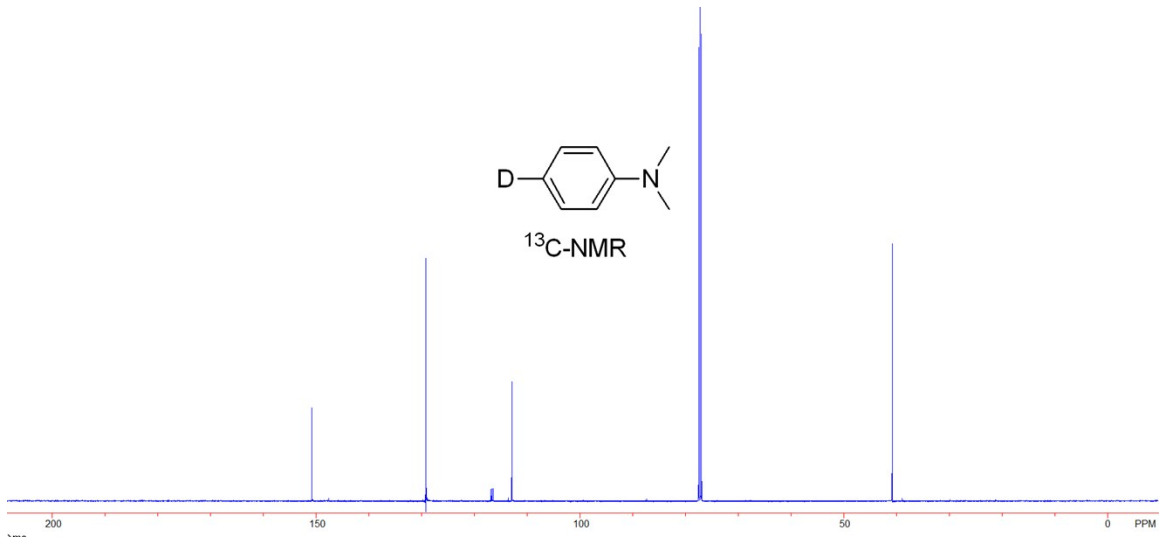

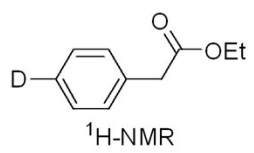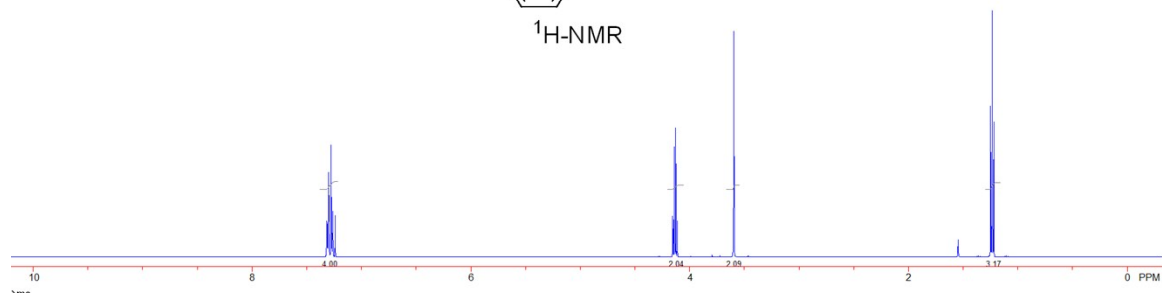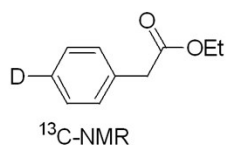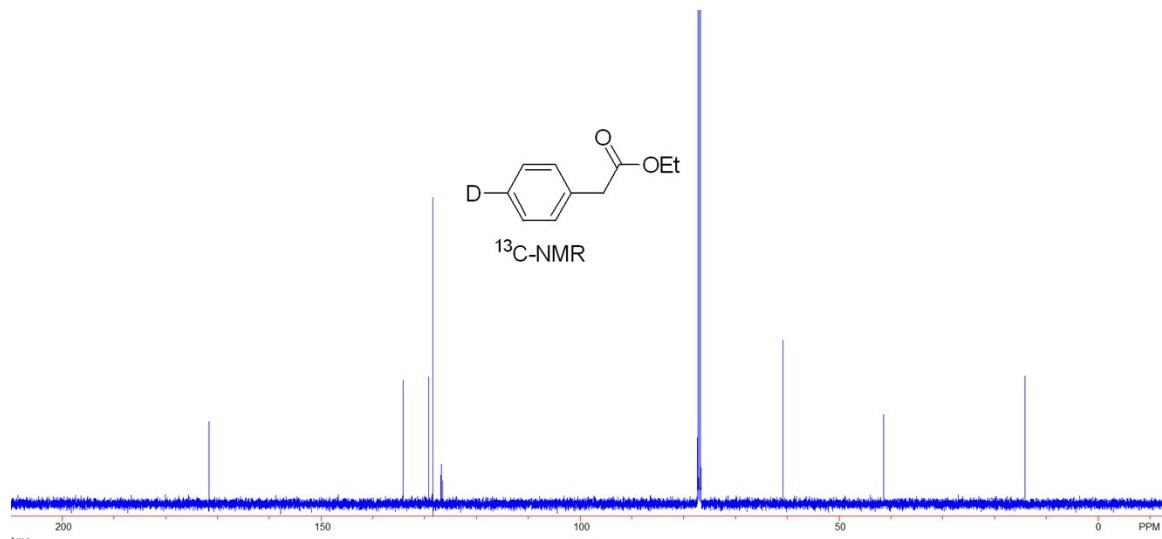



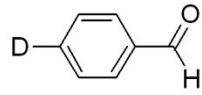

$^1\text{H-NMR}$

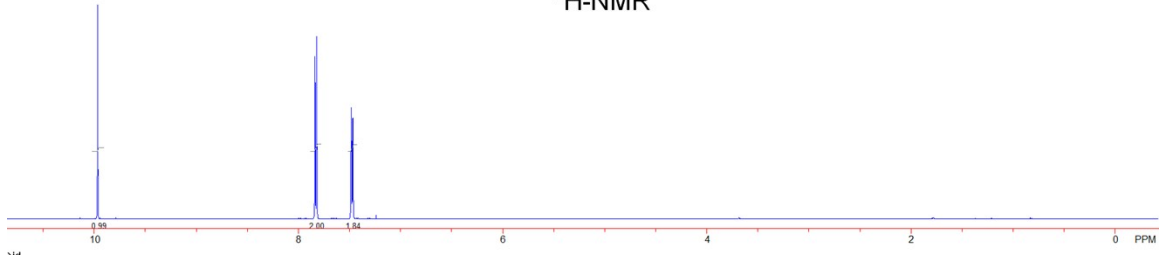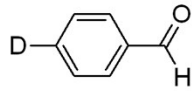

$^{13}\text{C-NMR}$

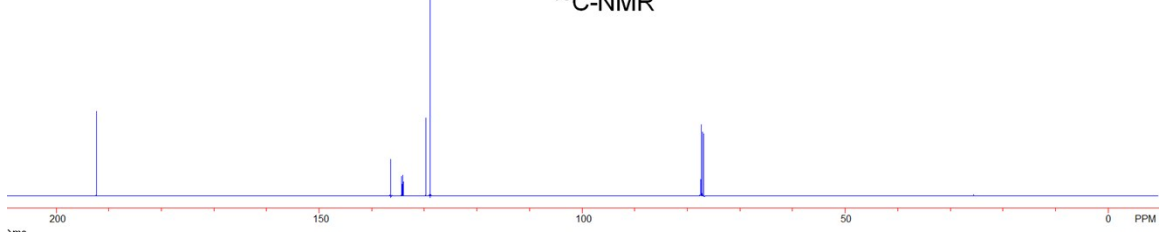

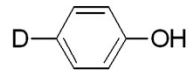

$^1\text{H-NMR}$

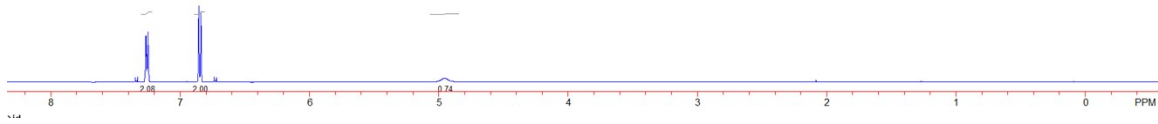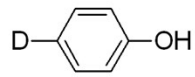

$^{13}\text{C-NMR}$

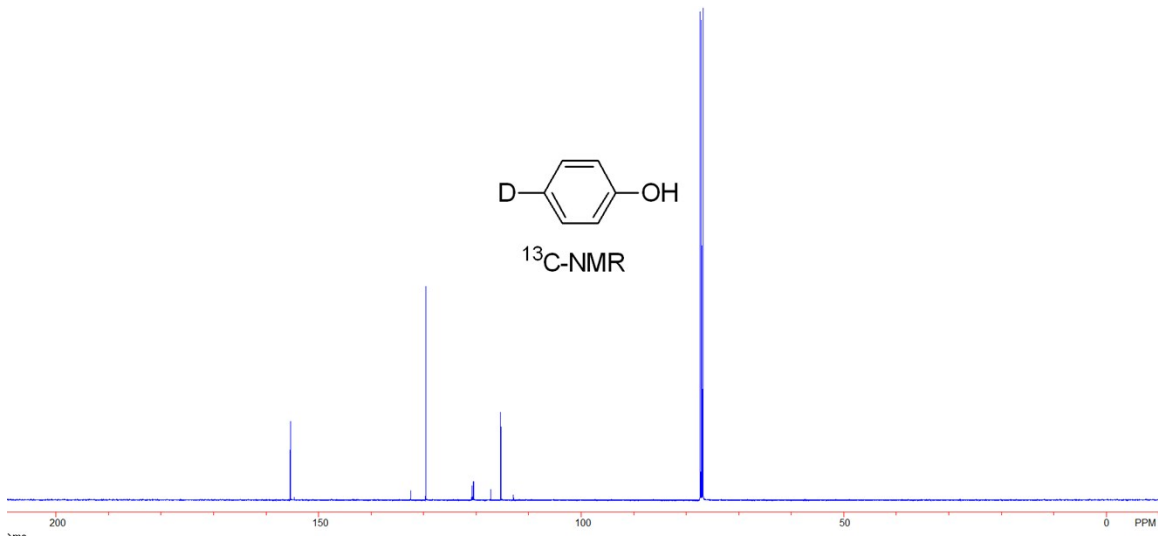

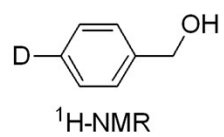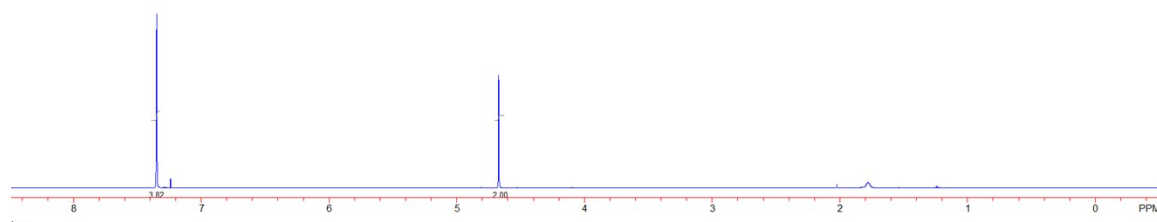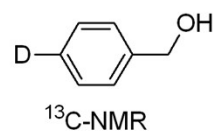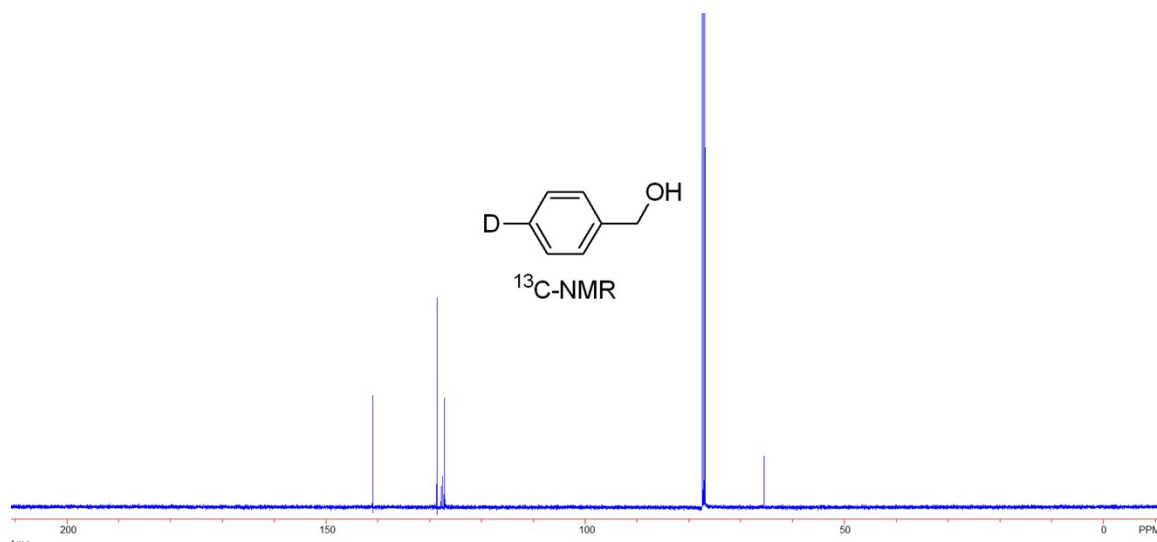

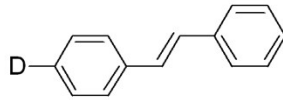

<sup>1</sup>H-NMR

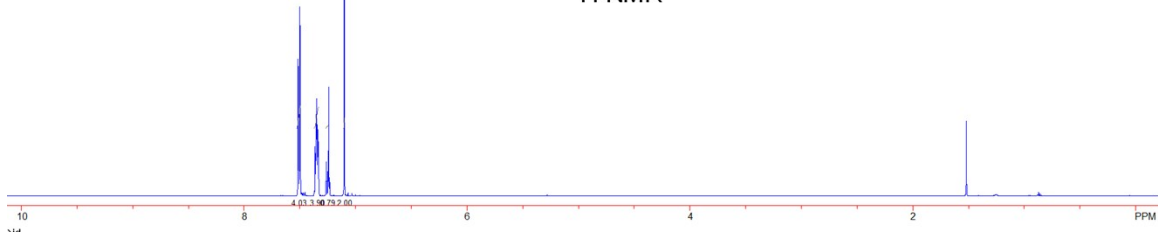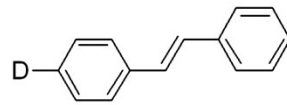

<sup>13</sup>C-NMR

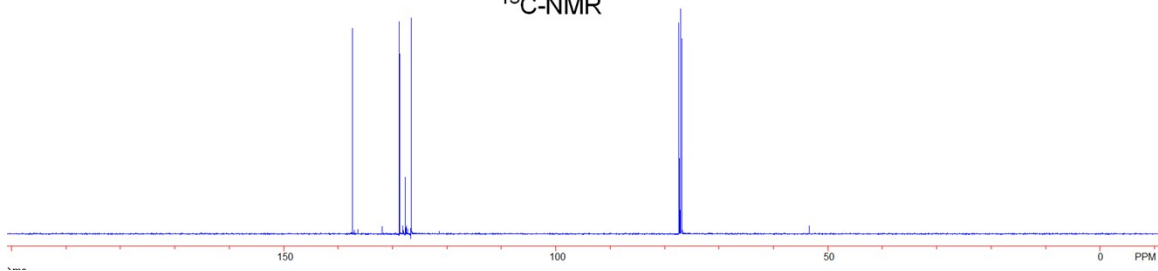

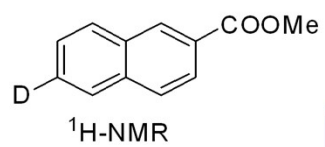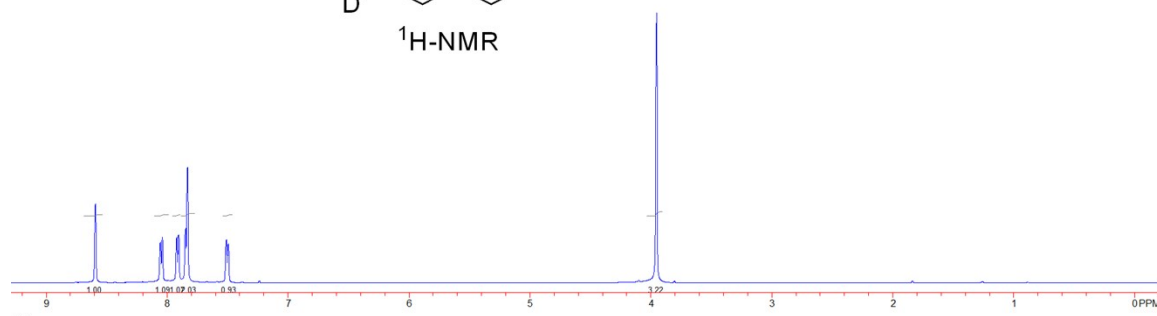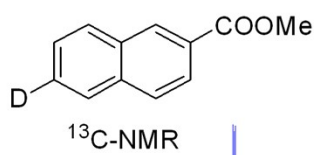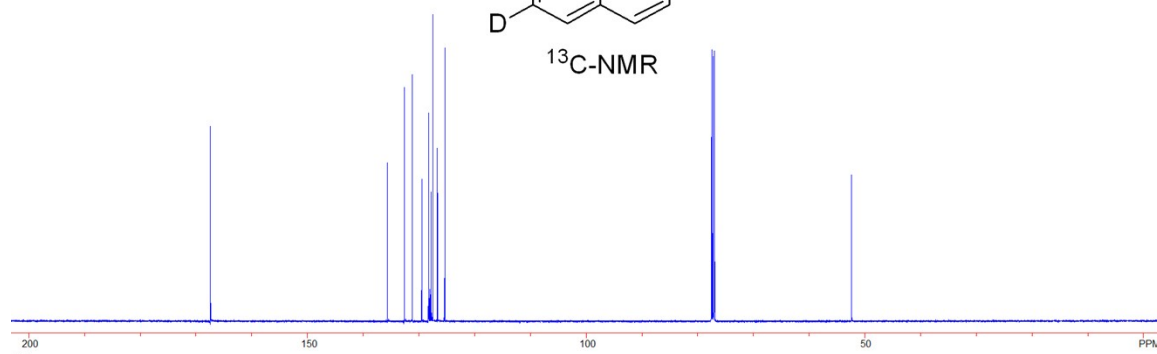

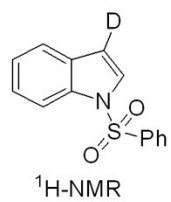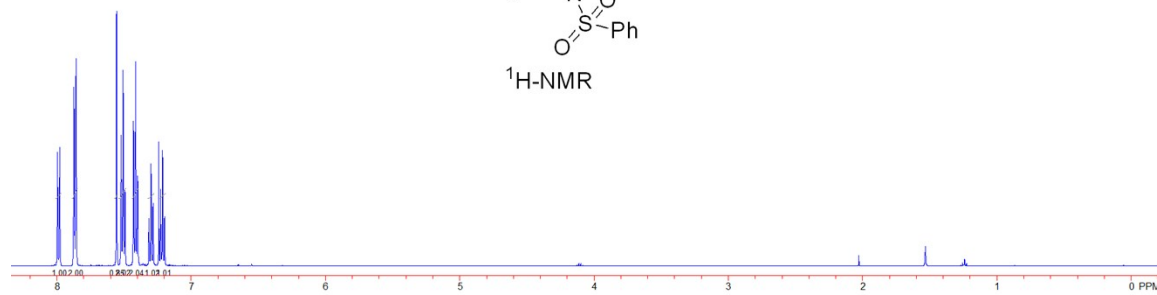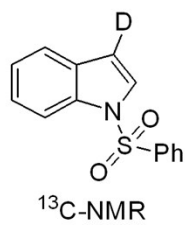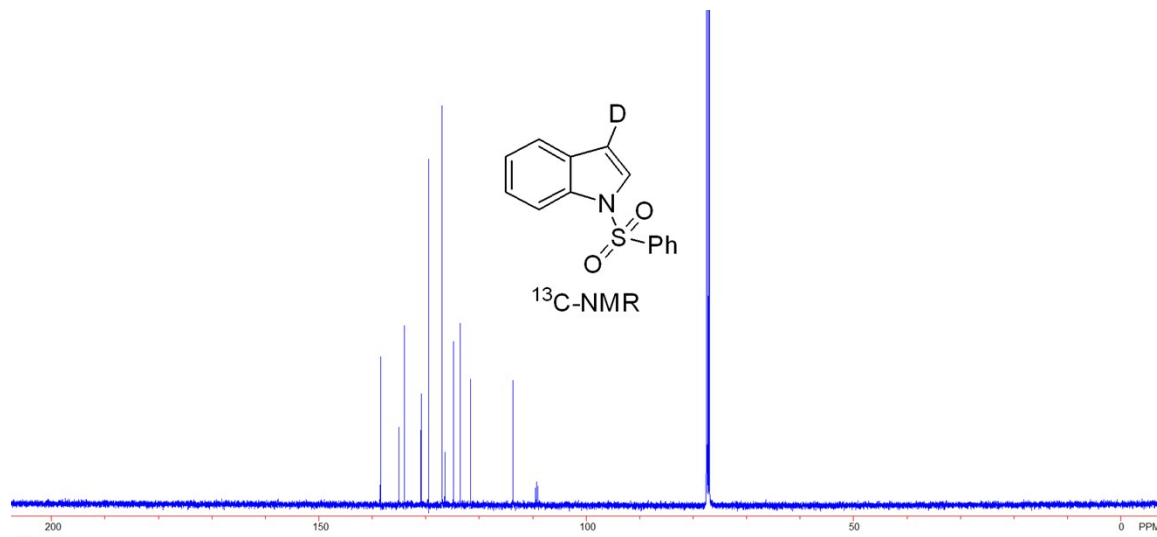

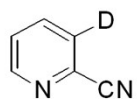

<sup>1</sup>H-NMR

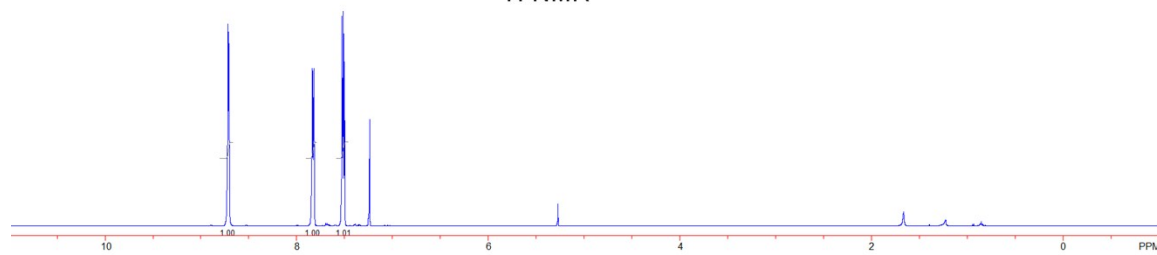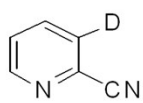

<sup>13</sup>C-NMR

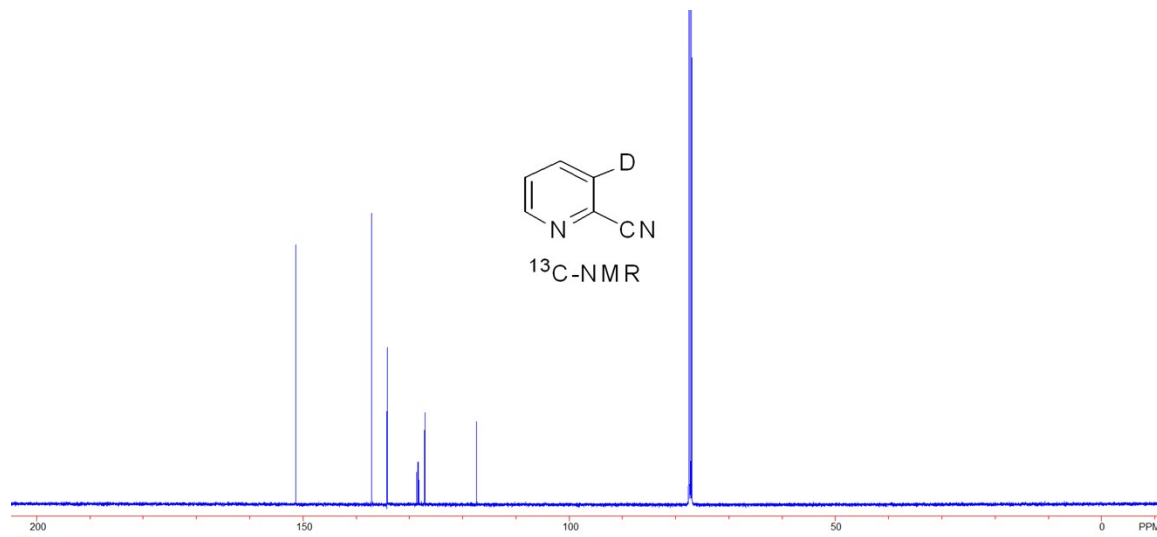

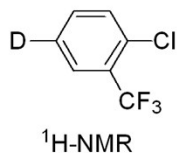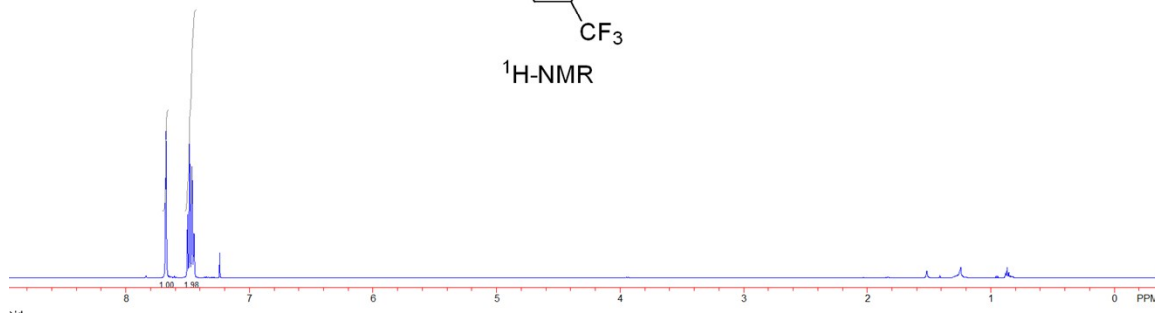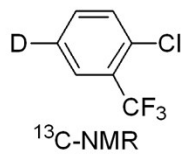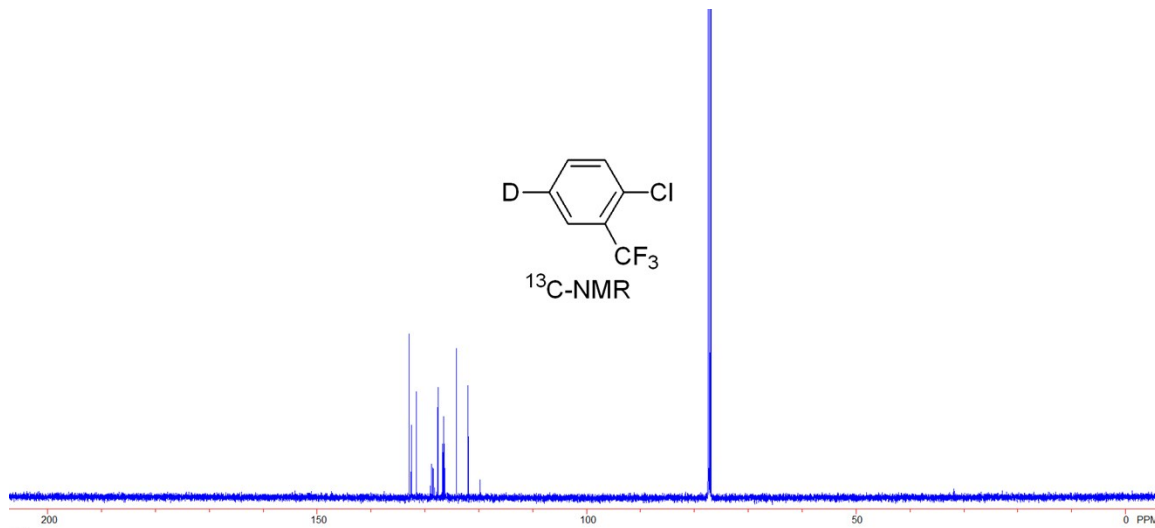



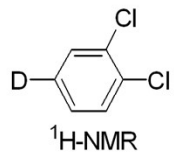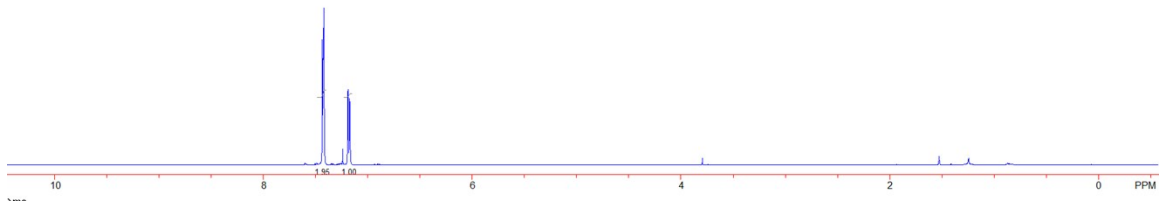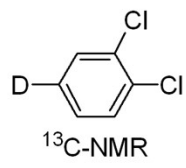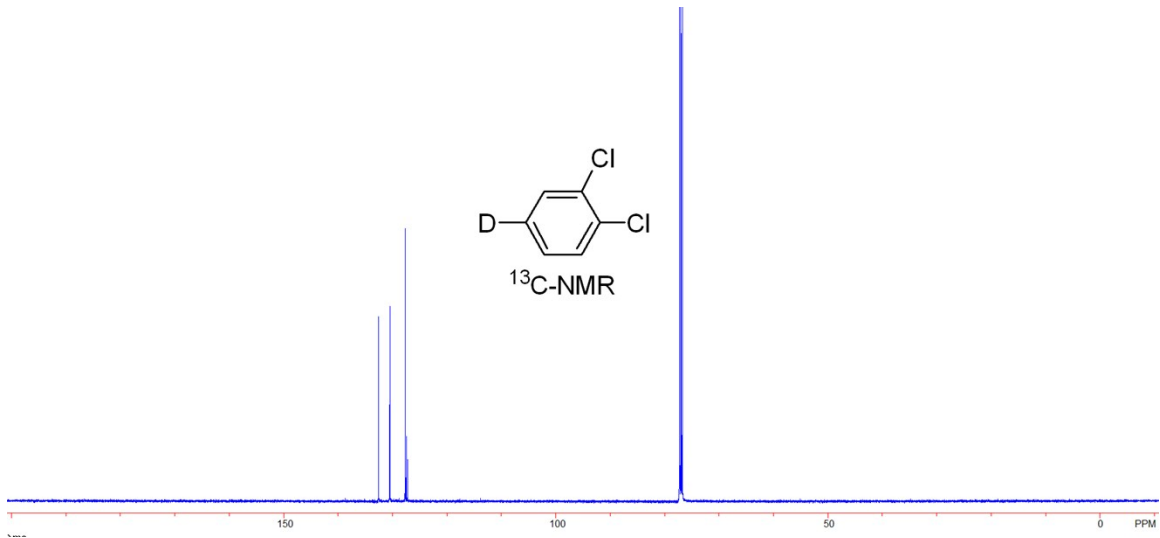

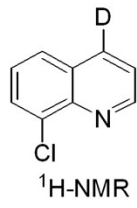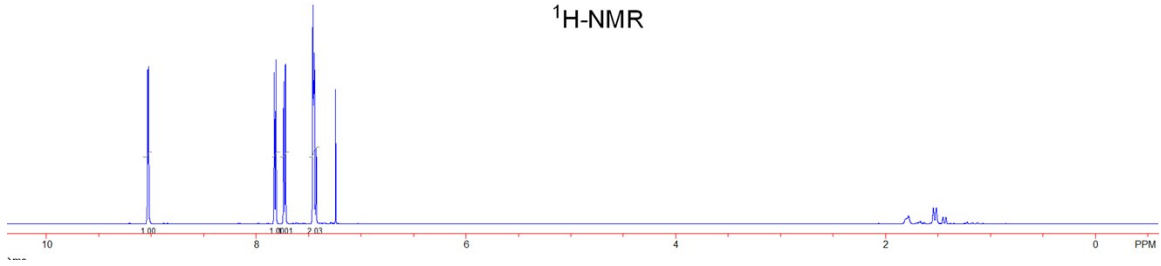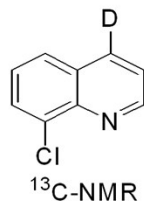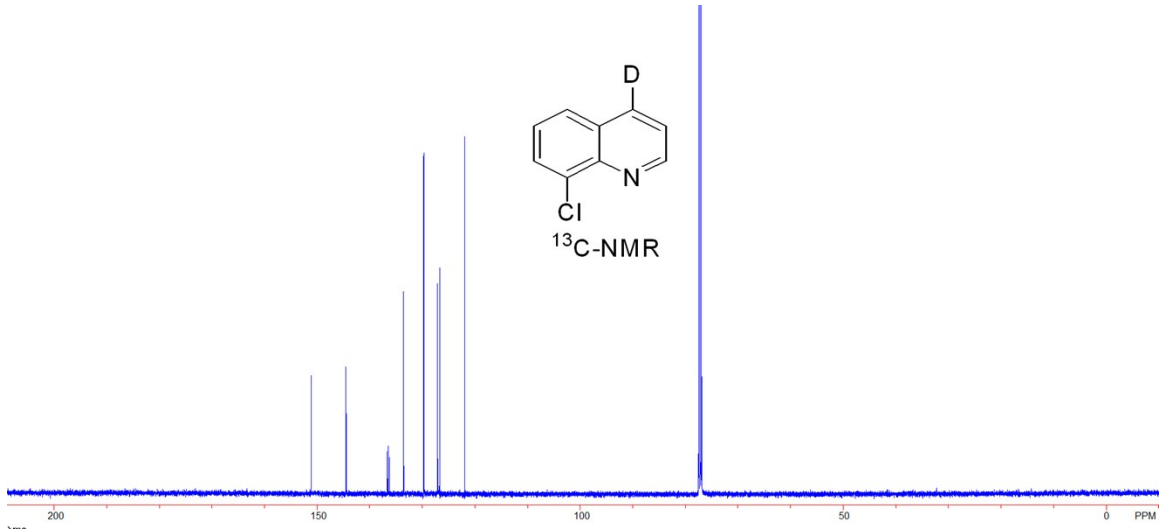

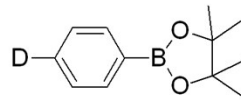

<sup>1</sup>H-NMR

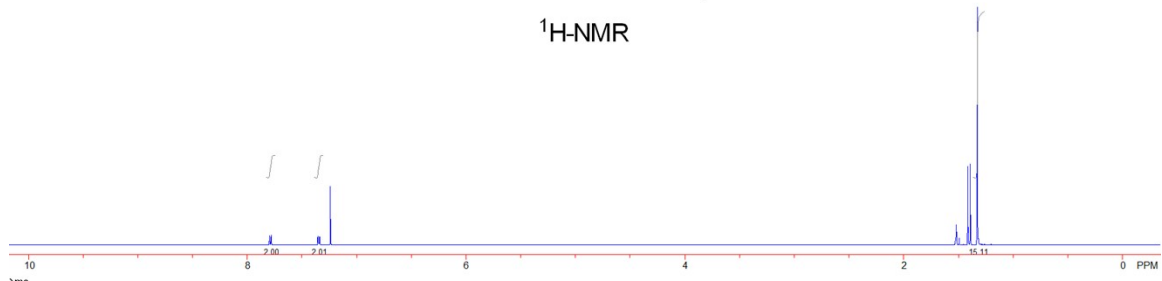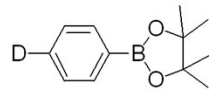

<sup>13</sup>C-NMR

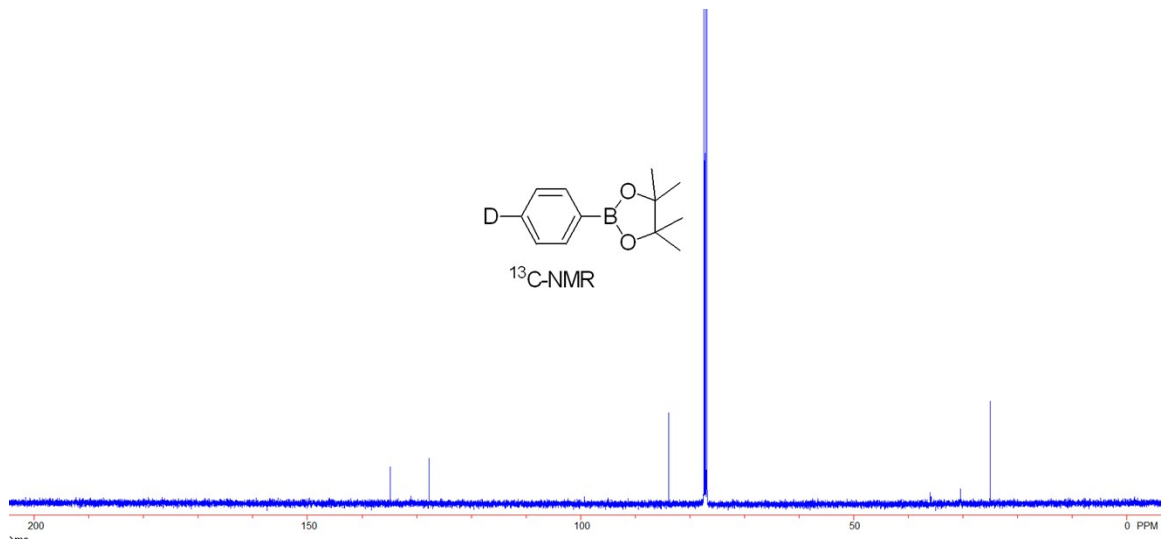

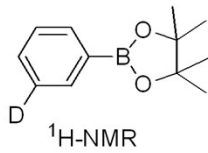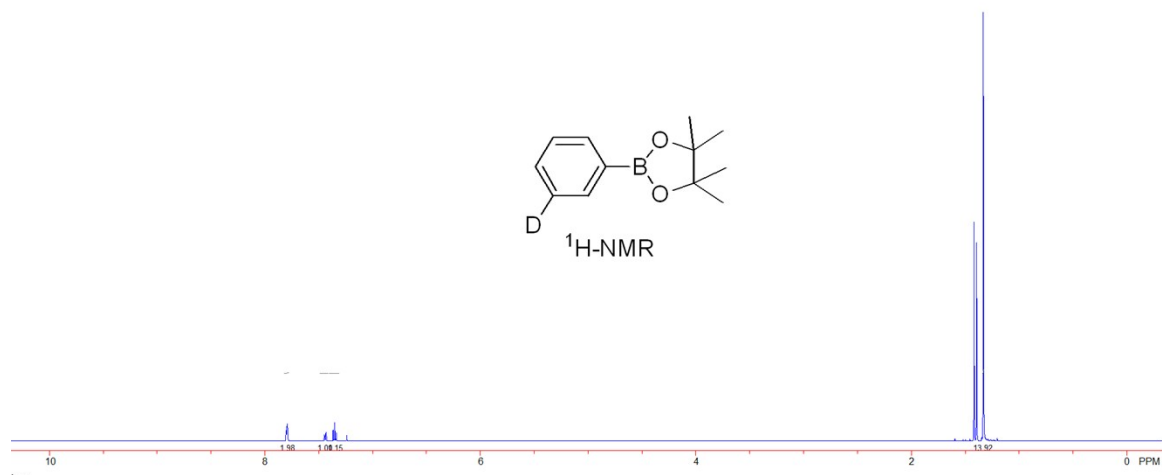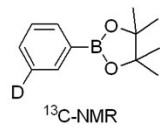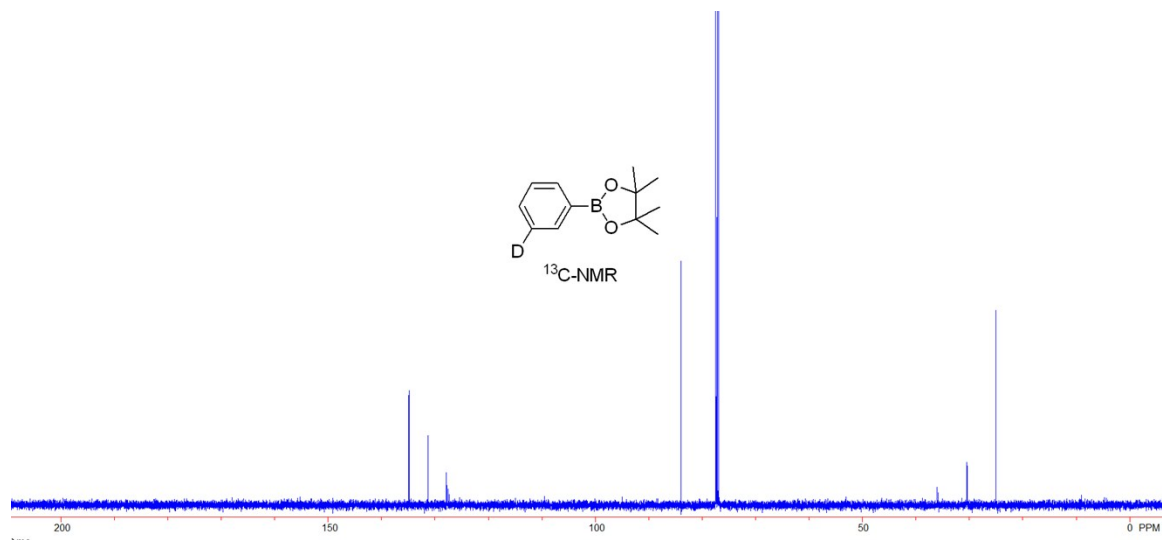

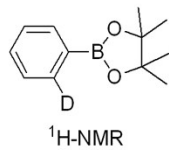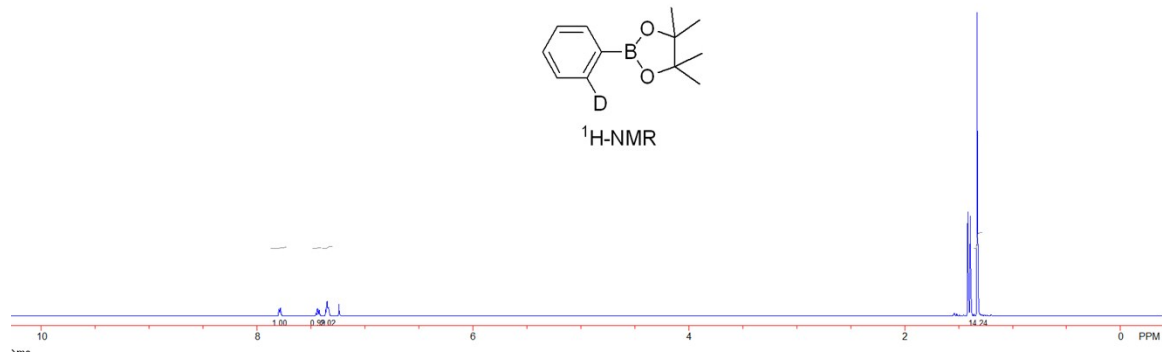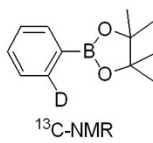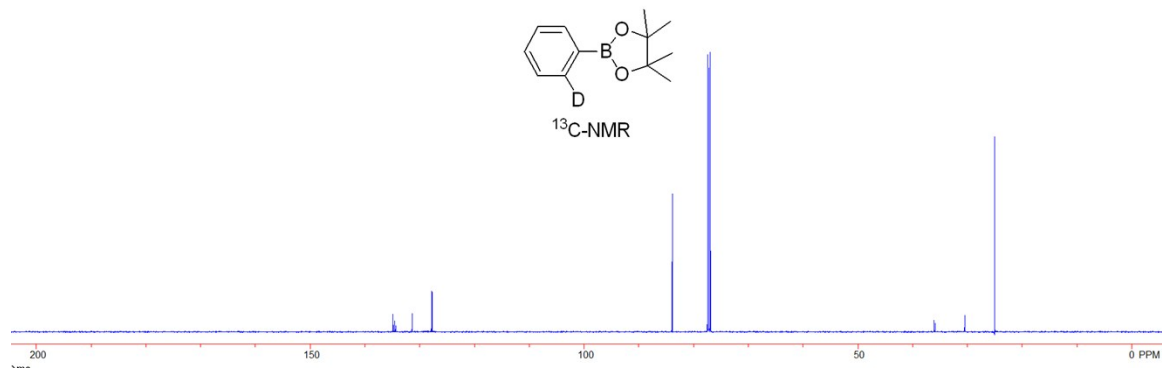

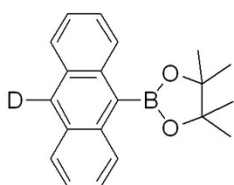

<sup>1</sup>H-NMR

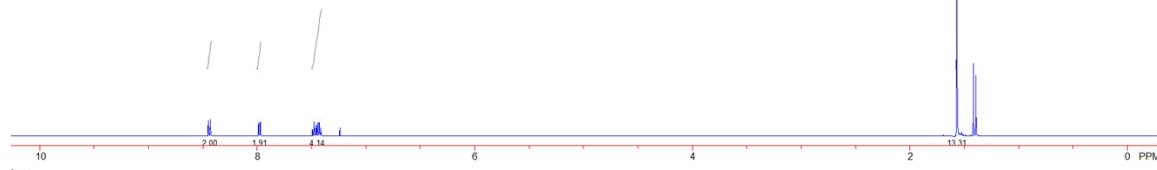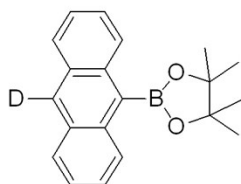

<sup>13</sup>C-NMR

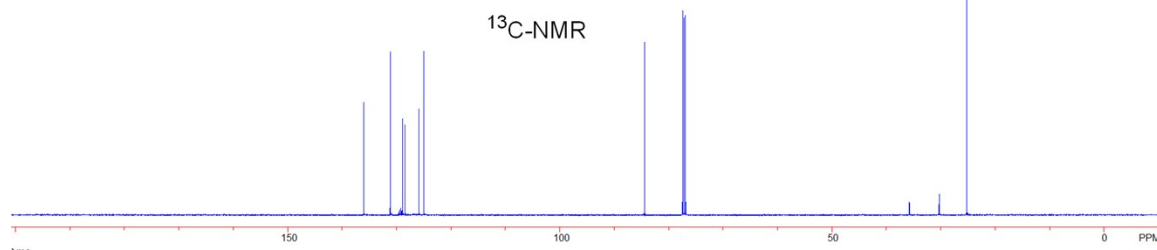

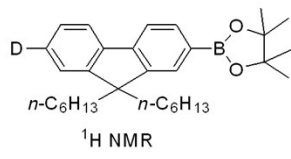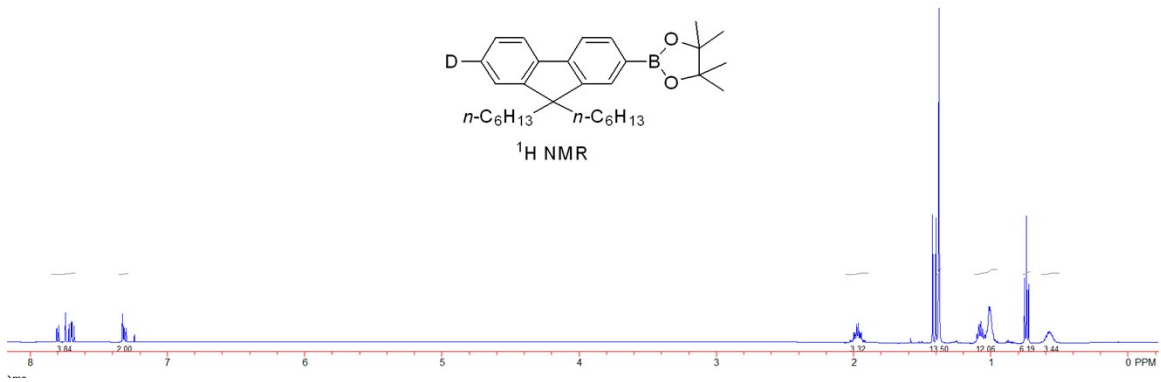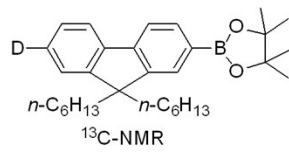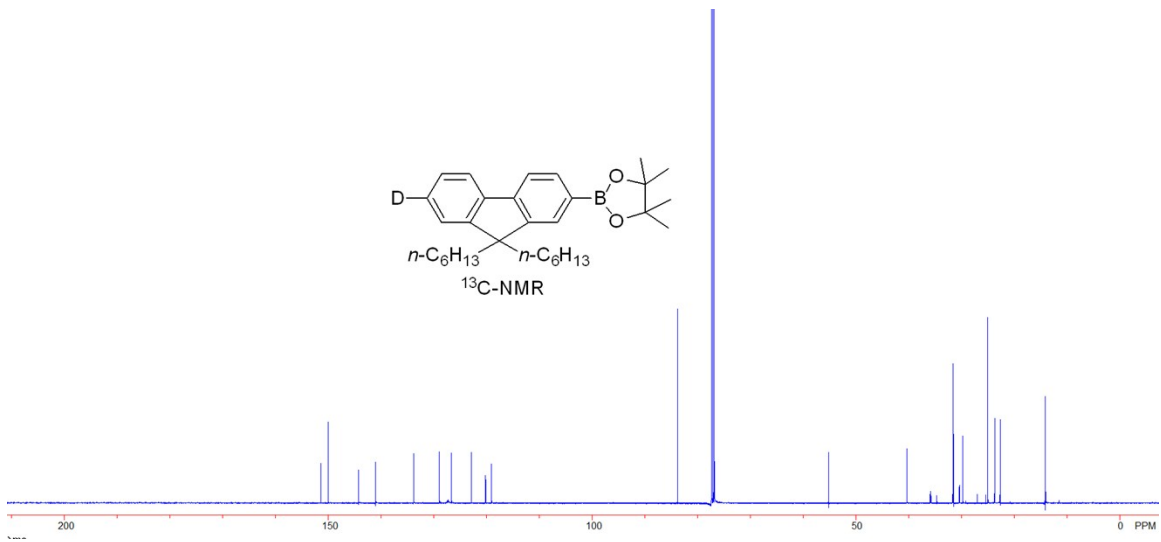

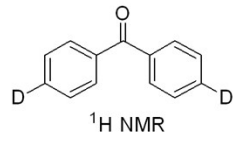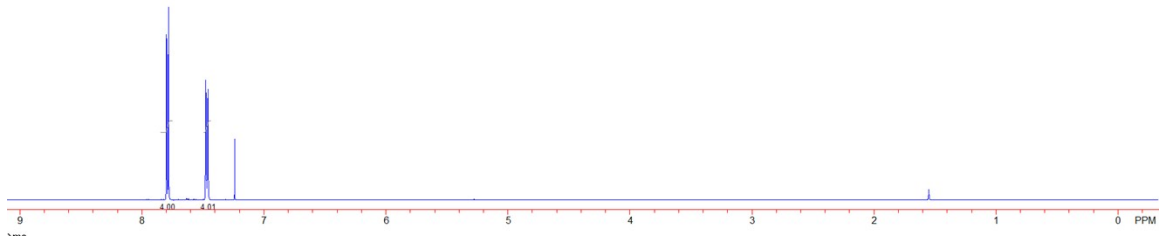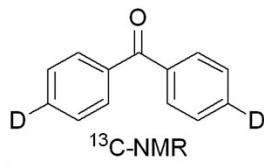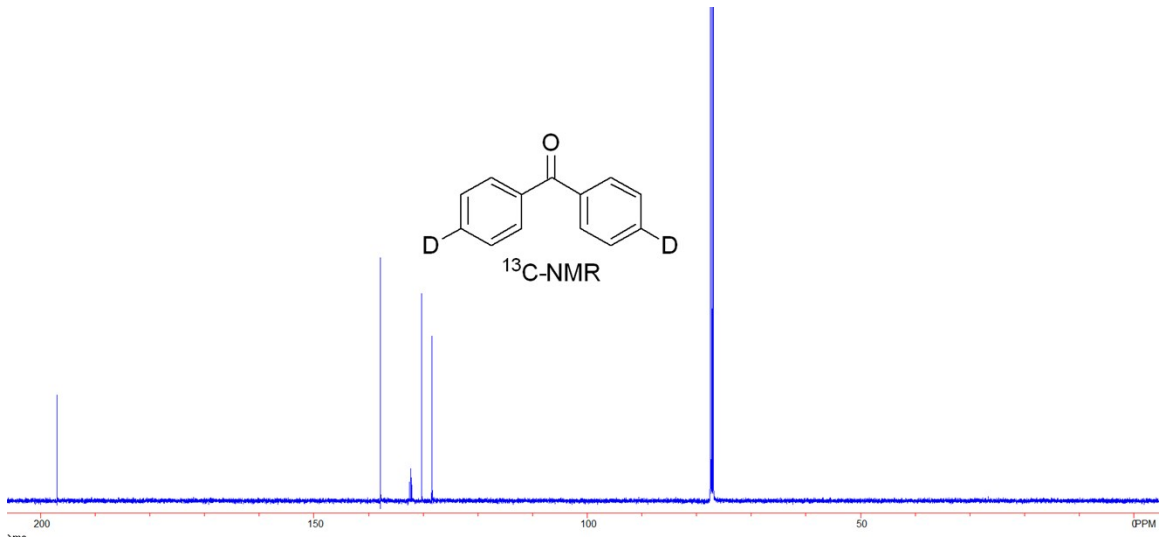



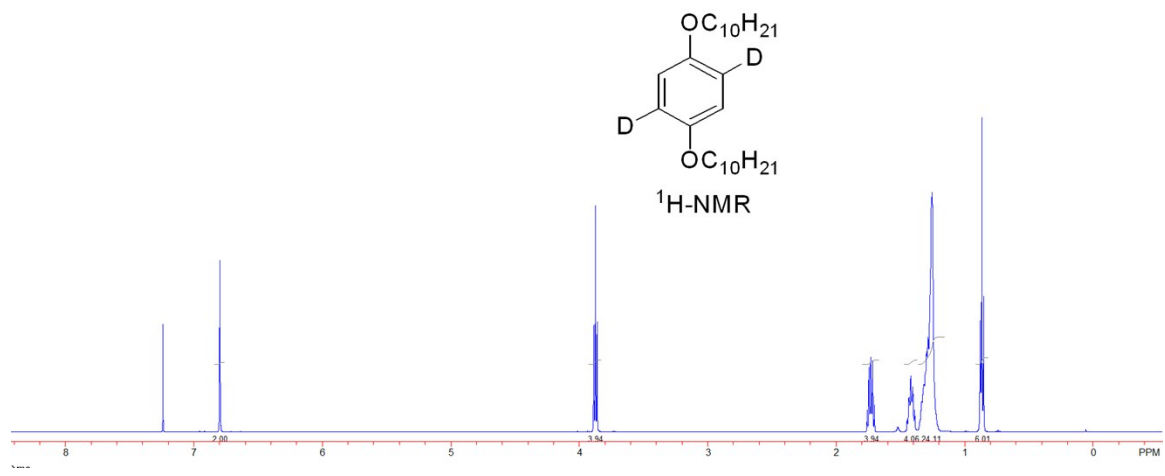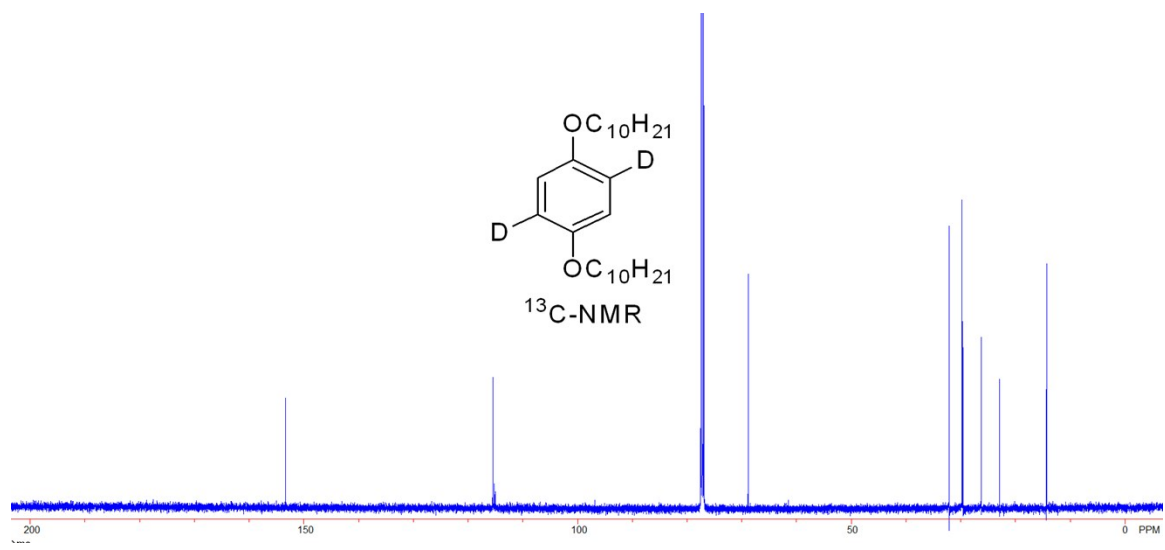

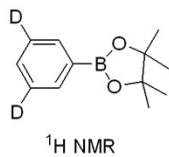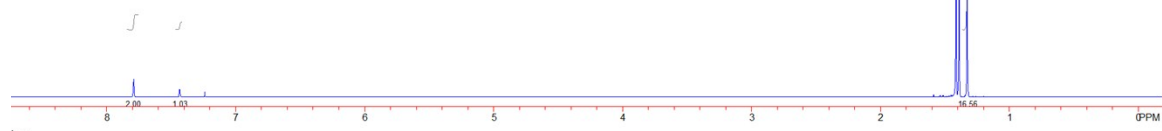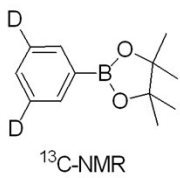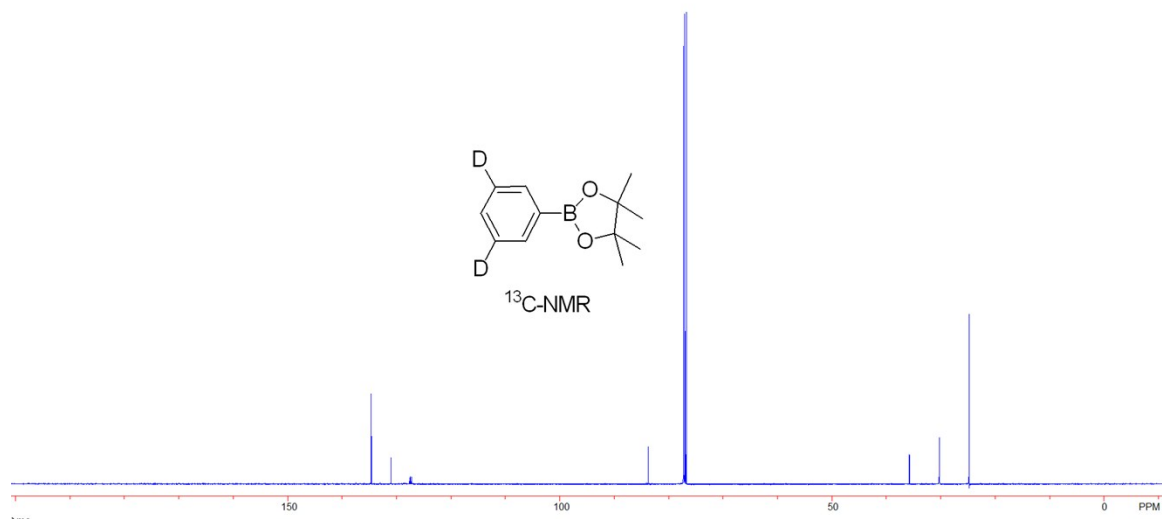

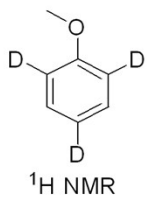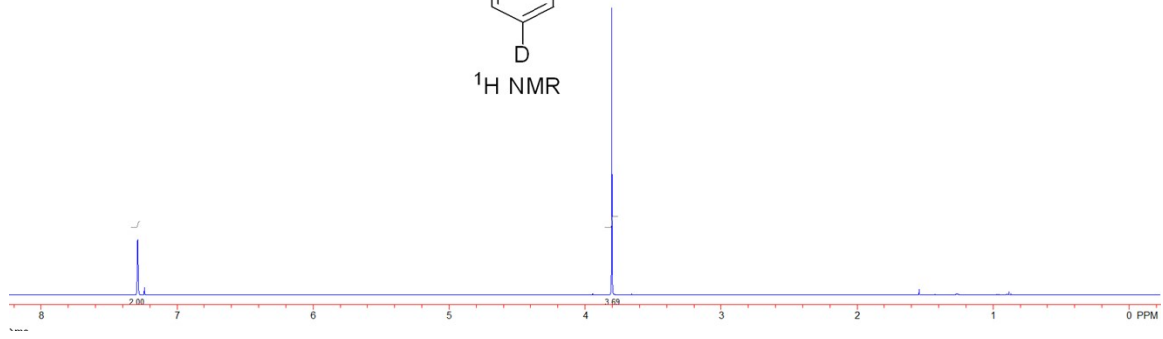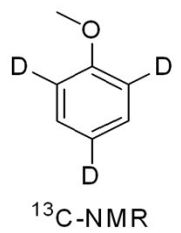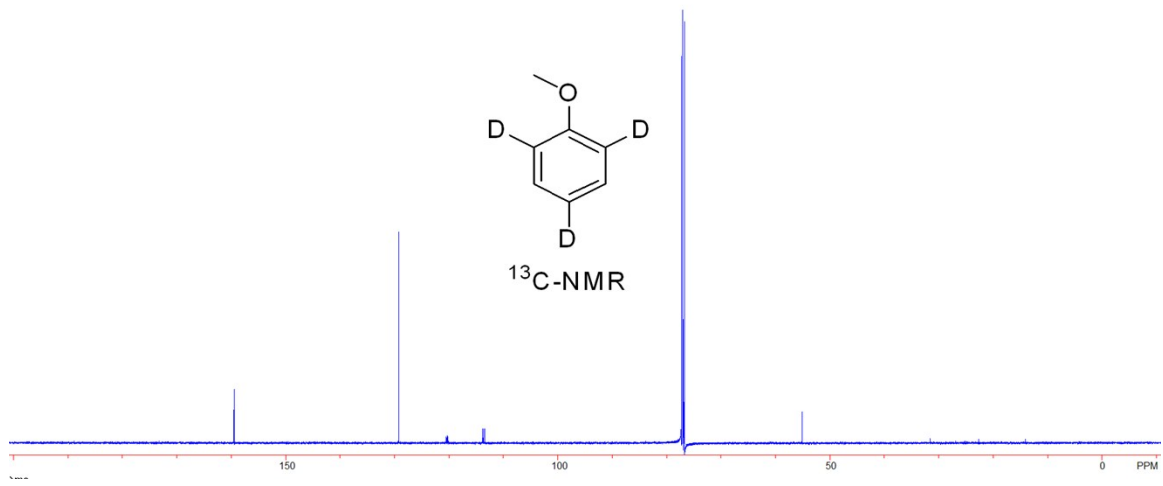

Supplement: c5qo00181a1.pdf [file c5qo00181a1.pdf]
